1 **ABSTRACT**

2

3 Establishing robust genome engineering methods in the malarial parasite, *Plasmodium*  
4 *falciparum*, has the potential to substantially improve the efficiency with which we gain  
5 understanding of this pathogen's biology to propel treatment and elimination efforts. Methods  
6 for manipulating gene expression and engineering the *P. falciparum* genome have been  
7 validated. However, a significant barrier to fully leveraging these advances is the difficulty  
8 associated with assembling the extremely high AT content DNA constructs required for  
9 modifying the *P. falciparum* genome. These are frequently unstable in commonly-used circular  
10 plasmids. We address this bottleneck by devising a DNA assembly framework leveraging the  
11 improved reliability with which large AT-rich regions can be efficiently manipulated in linear  
12 plasmids. This framework integrates several key functional genetics outcomes via CRISPR/Cas9  
13 and other methods from a common, validated framework. Overall, this molecular toolkit  
14 enables *P. falciparum* genetics broadly and facilitates deeper interrogation of parasite genes  
15 involved in diverse biological processes.

## 1 INTRODUCTION

2 Malaria is an infectious disease caused by five different species of *Plasmodium* parasites and  
3 continues to be a leading cause of morbidity and mortality worldwide. In 2017, there were over  
4 219 million malaria cases and 435,000 deaths due mostly to *Plasmodium falciparum* infections  
5 (WHO, 2017). Basic molecular understanding of these parasites is still limited, and this impedes  
6 efforts to discover new therapeutic approaches to preventing, treating and eliminating malaria.  
7 The genomes of several *Plasmodium* species have now been sequenced, and nearly half of the  
8 identified genes are of uncharacterized function (Gardner et al., 2002). Therefore, functional  
9 genetics studies will be vital for systematically defining the roles of the various parasite genes  
10 toward improving our overall understanding of *Plasmodium* parasite biology. A key requirement  
11 for maximizing the effectiveness of this approach is the ability to selectively perturb gene  
12 expression to study biological function in detail.  
13  
14 Several recently-completed genome-scale studies have provided novel and substantial insights  
15 towards categorizing genes that are likely essential versus dispensable to survival of *Plasmodium*  
16 *spp* (Bushell et al., 2017; Zhang et al., 2018), and the related Apicomplexan parasite,  
17 *Toxoplasma gondii* (Sidik et al., 2016). The first comprehensive dataset came from a genome-  
18 wide CRISPR/Cas9 deletion screen in the genetically-tractable *T. gondii*. Homologous  
19 recombination-mediated knockout screens in the model rodent malaria parasite *Plasmodium*  
20 *berghei* (Bushell et al., 2017) and piggyBac saturation insertional mutagenesis screens in *P.*  
21 *falciparum* (Zhang et al., 2018) have also provided unprecedented insight into the complement of  
22 likely essential genes during asexual blood stage development in these comparably less  
23 genetically-tractable organisms. The above screening approaches facilitate identification of

1 likely essential genes through the inability to recover surviving parasites mutated or deleted in a  
2 given locus. As such, stable cell lines with disrupted essential gene loci are usually not  
3 recovered, and this precludes direct follow-up to elucidate function. Therefore, validating the  
4 findings of these high throughput screens, and achieving detailed understanding of biological  
5 function requires implementing scalable approaches that harness methods for conditionally  
6 perturbing the expression of a rapidly expanding number of identified essential genes. Several  
7 factors impede this process. First, the most robust and reliable conditional gene expression  
8 systems used currently in *Plasmodium* parasites require genetically encoding information at  
9 native chromosomal loci using homology-based donor vectors (Collins et al., 2013; Ganesan et  
10 al., 2016; Goldfless et al., 2014; Jones et al., 2016; Prommana et al., 2013). Second, a genomic  
11 AT content exceeding 80% (Gardner et al., 2002) complicates efficient, scalable assembly of the  
12 DNA vectors needed to achieve these modifications. Third, relatively inefficient spontaneous  
13 single- and double- crossover events have typically been used to modify target loci in a  
14 protracted process (Carvalho and Ménard, 2005). Combined, these factors complicate efforts to  
15 genetically modify many gene loci in parallel. Successful genome editing in *P. falciparum* using  
16 zinc finger nucleases (ZFNs) (Straimer et al., 2012) and CRISPR/Cas9 (Ghorbal et al., 2014;  
17 Wagner et al., 2014) provide attractive solutions for improving the ease with which targeted gene  
18 locus modification can be achieved. However, scalable and efficient application of these  
19 approaches will require facile and reliable construction of AT-rich, homology-based vectors  
20 suitable for delivering the desired final functional modifications.

21  
22 Here we demonstrate a highly adaptable framework that flexibly provides reliable and scalable  
23 assembly of *P. falciparum* vectors to support stable episomal maintenance of bacterial artificial

1 chromosomes (BACs), genome modification by single- and double-crossover integration and  
2 *Bxb1*-mediated integration (Nkrumah et al., 2006) and gene-specific editing using CRISPR/Cas9  
3 strategies. To complement CRISPR/Cas9 genome editing experiments, we have generated a  
4 parasite cell line stably expressing the Cas9 editing machinery, which serves as a convenient  
5 alternative to co-delivery of Cas9 during transfection. We include within this framework the  
6 abilities to flexibly epitope tag, conditionally regulate, knockout and/or complement/overexpress  
7 target genes. We show that assembly of large, AT-rich regions typically encountered when  
8 creating *P. falciparum* expression and homology-directed repair vectors is readily achieved. The  
9 vectors produced using this approach successfully yield transgenic parasites in which genetic  
10 elements are either episomally maintained or chromosomally integrated as pre-specified, and that  
11 pre-installed regulatory components function as expected. Altogether, this harmonized functional  
12 genetics toolbox represents a well-validated and standardized resource that will be useful for  
13 meeting the growing and diverse needs of *P. falciparum* functional genetics.

## 1   **RESULTS and DISCUSSION**

2

### 3   **Rationale motivating vector assembly framework**

4   Several challenges associated with vector assembly limit the ease and scale of target-specific  
5   functional genetics studies in *P. falciparum* (Wagner et al., 2013). We defined key limitations to  
6   overcome and useful enabling functionalities to capture in our designs. We identified the need  
7   for a robust cloning chassis that supports easy manipulation and stable maintenance of AT-rich  
8   *P. falciparum* genomic DNA of broad size ranges. This permits unconstrained user selection of  
9   DNA fragment sizes best suited to the downstream application. When AT-rich sequences are  
10   present in the typical circular plasmids used to generate transgenic *P. falciparum*, they are often  
11   and unpredictably deleted and/or induce rearrangements during propagation in *E. coli* (Godiska  
12   et al., 2010). To overcome this, we selected the linear pJAZZ plasmid vector (Lucigen) as the  
13   chassis for all routine DNA assembly operations, as it has been used to successfully manipulate  
14   large AT-rich genomic fragments, including those derived from the related model rodent malaria  
15   parasite, *P. berghei* (Godiska et al., 2010; Pfander et al., 2011). We reasoned that this context  
16   would allow rapid and modular DNA assembly to be completed with high fidelity and improve  
17   overall vector construction efficiency.

18

19   While linear plasmids can facilitate accelerated DNA part assembly, only circular plasmids are  
20   stably replicated episomally in *P. falciparum* (Deitsch et al., 2001). Thus, to retain this option, a  
21   strategy for efficiently converting linear plasmids into circular forms while avoiding undesirable  
22   rearrangements is beneficial. Supercoiling in circular plasmids induces single-stranded regions  
23   within AT-rich sequences making these susceptible to nicking and deleterious rearrangements

1 that reduce torsional stress (Benham, 1979). Therefore, rather than converting linear vectors into  
2 plasmids, we reasoned that rescuing linear vectors containing AT-rich sequences into larger  
3 BACs where supercoiling-induced torsional stress and plasmid instability are inherently lower  
4 would be highly effective. In other contexts, uncomplicated by highly AT-rich sequences, this  
5 approach has been used successfully (Guye et al., 2013). We anticipate that establishing similar  
6 approaches for *P. falciparum* will facilitate using standardized procedures to streamline and scale  
7 up production of vectors needed to pursue a range of functional genetics studies.

8

### 9 **Large DNA fragments containing multiple, AT-rich *P. falciparum* gene expression** 10 **regulatory regions are readily ported to linear vectors**

11 We examined the feasibility of rapidly transferring large, pre-existing DNA fragments into this  
12 linear plasmid format. This option permits direct transfer of existing parts to this new framework,  
13 while preserving access to existing user-preferred features. To demonstrate this, we transferred  
14 two configurations of our validated TetR-aptamer regulatory system that we also intended to  
15 hardwire into all future linear vector designs (Figure 1A). In the first case, an ~7.5 kb fragment  
16 consisting of two head-to-head *P. falciparum* cassettes was transferred. One cassette encodes  
17 TetR, *Renilla* luciferase (RL) and Blasticidin S deaminase (*bsd*) as a multicistronic message  
18 using the viral 2A peptide (Straimer et al., 2012; Wagner et al., 2013). The other cassette  
19 encodes *Firefly* luciferase (FLuc) regulated by a single TetR aptamer in its 5' *UTR* (Goldfless et  
20 al., 2014). In the second case, an ~9.5 kb fragment similar to that described above was migrated,  
21 except that the TetR component in the first cassette is replaced by a TetR-DOZI fusion, and an  
22 array of ten tandem TetR aptamers is included just upstream of the 3' *UTR* in the FLuc cassette  
23 (Ganesan et al., 2016).

1  
2 We opted for PCR-free transfer of these fragments to minimize the risk of introducing  
3 functionally deleterious mutations. We synthesized a gene block containing regions homologous  
4 to the fragments to be transferred using the Gibson assembly method (Gibson et al., 2009), and  
5 pre-installed this into the parental pJAZZ linear vector to create pSwing (Figure 1B and  
6 Supplementary Methods Figure 2). We released both target fragments from the circular pSN372  
7 and pSN1847 by ScaI and NotI double digestion, cut pSwing using SacII and used single pot, 3-  
8 piece Gibson assemblies to produce pSN372L and pSN1847L (Figure 1B and Supplementary  
9 Methods Figure 3). We screened bacterial colonies by restriction enzyme mapping to identify  
10 plasmids having the expected digestion pattern (Figure 1C). These data show that large, pre-  
11 existing fragments containing AT-rich regions interspersed with regulatory components required  
12 for regulating *P. falciparum* gene expression are readily imported into this linear vector chassis.

### 13 14 **Linear vectors can be rescued into BACs that successfully transform *P. falciparum***

15 The linear vectors generated above must be converted into circular plasmids for stable episomal  
16 propagation or *Bxb1*-catalyzed chromosomal integration in *P. falciparum*. We rescued pSN372L  
17 and pSN1847L into BACs using an adapter plasmid (pAdapter) and a BAC recipient (BigBOB)  
18 as described (Guye et al., 2013). Fragments encoding components to be expressed in *P.*  
19 *falciparum* were released from pSN372L or pSN1847L by NotI/I-SceI restriction enzyme  
20 digestion, and assembled with pAdapter and BigBOB in single pot, 3-piece Gibson assembly  
21 reactions (Figure 2A). We analyzed colonies containing the rescued pSN372R and pSN1847R  
22 BACs to confirm successful transfer of the pSN372L and pSN1847L fragments, respectively.  
23 Restriction digestion mapping showed that BACs with the expected topology were obtained



1 (Figure 2B). These data indicate that the linear vector-encoded sequence information critical for  
2 *P. falciparum* genetics studies can be readily rescued into BACs without the rearrangements  
3 frequently observed during construction of circular plasmids typically used for cloning AT-rich  
4 *P. falciparum* sequences.

## 6 **Regulatory components for controlling gene expression function predictably in BACs**

7 Next, we sought to understand whether pSN372R and pSN1847R would: (1) successfully  
8 transform *P. falciparum*, both in episomal and chromosomally-integrated contexts; and (2) yield  
9 functional outcomes similar to those obtained using traditional *P. falciparum* expression vectors.  
10 We transfected pSN372R and pSN1847R alone for episomal maintenance, or co-transfected with  
11 a plasmid encoding the *Mycobacterium Bxb1* integrase (pINT) (Nkrumah et al., 2006) to achieve  
12 site-specific integration at the *cg6* locus in an NF54<sup>attB</sup> line (Adjalley et al., 2011). We selected  
13 parasites using Blasticidin S and monitored *Renilla* luciferase signal over the transfection.  
14 *Renilla* luciferase signal increased with the expected kinetics (Wagner et al., 2013) for  
15 transfections expected to result in episomal BAC maintenance or *Bxb1*-mediated site-specific  
16 integration (Nkrumah et al., 2006) of the BAC at the *cg6* locus (Figure 2C). Taken together,  
17 these data indicate that BACs generated through this process successfully transform *P.*  
18 *falciparum* and the cassettes mediating *Renilla* luciferase and Blasticidin S deaminase transgene  
19 expression remain functionally intact.

20  
21 We also wished to ensure that regulated gene expression mediated by the TetR and TetR–DOZI  
22 regulatory components hardwired into our linear vector and BAC frameworks was not  
23 compromised. Therefore, we measured anhydrotetracycline (aTc)-regulated expression of the

1 *firefly* luciferase reporter gene encoded by these constructs in parasites harboring chromosomally  
2 integrated pSN372R and pSN1847R. These data show that aTc regulates *firefly* luciferase  
3 expression by 8-fold (pSN372) and 115-fold (pSN1847) when a regular plasmid is integrated,  
4 and ~7-fold (pSN372R) and 145-fold (pSN1847R) when the rescued BACs are integrated  
5 (Figure 2D). This degree of regulation is consistent with that observed in the context of the  
6 plasmids traditionally used in *P. falciparum* (Ganesan et al., 2016; Goldfless et al., 2014).  
7 Importantly, these data demonstrate that information needed to achieve gene expression and  
8 regulation outcomes in *P. falciparum* can be encoded on BAC constructs without compromising  
9 how these DNA parts function in the parasite.

10

### 11 **Modular linear vectors enable easily programmable and multi-functional designs**

12 We generated several customizable base vectors pre-configured to achieve several key outcomes  
13 desired for functional genetics studies in *P. falciparum* (Figure 3 and Supplementary Figure 1).  
14 We defined standardized architectures that collectively facilitate: promoter/5'-UTR swapping; N-  
15 and/or C- terminal epitope tagging; conditional regulation of gene expression; and genetic  
16 complementation by episomal or site-specific chromosomal integration. The components  
17 required for TetR aptamer-mediated regulation are hardwired into these base constructs. All  
18 variable parts needed to achieve locus-specific modification or transgene expression are modular,  
19 and we have enabled site-specific integration of any designed construct into the genome either  
20 through *Bxb1*-mediated *attB* × *attP* recombination, spontaneous single- and/or double-crossover  
21 integration or CRISPR/Cas9- and ZFN-mediated genome editing methods.

22

### 23 ***Genetic complementation and transgene expression***

1 pSN154 is designed to enable several outcomes, including gene complementation by either  
2 stable episome maintenance or *Bxb1* integrase-mediated chromosomal integration of rescued  
3 BACs via *attP* sites. Unique restriction sites (AsiSI, BsrBI and DraIII) modularize a region  
4 encoding a preinstalled T2A ‘skip peptide’ and HA epitope tag to allow synthesis of well-defined  
5 N-termini to either accommodate inclusion of leader peptides directing organelle-specific  
6 trafficking or optional epitope tags for protein detection. Similarly, C-terminal epitope tags  
7 (FLAG, c-Myc, HA) are preinstalled, and can be individually selected for inclusion in the  
8 encoded transgene via DraIII/BsiWI restriction sites. For regulated transgene expression, either a  
9 single and/or ten tandem TetR aptamers are preinstalled in the 5’- and 3’-UTRs, respectively.  
10 The 5’-UTR/promoter is modular (AscI/AflIII) to allow straightforward exchange for perturbing  
11 transgene expression timing and levels (Bozdech et al., 2003b; Le Roch et al., 2003). A multi-  
12 cistronic regulatory module containing a TetR–DOZI<sub>T2A</sub>RLuc<sub>T2A</sub>Blasticidin S deaminase cassette  
13 using the T2A “skip” peptide is encoded on the same plasmid to permit regulated transgene  
14 expression (TetR–DOZI), quantitative monitoring of transfected parasites (RLuc), and positive  
15 selection of transformed parasites (Blasticidin S deaminase). This feature also ensures that all  
16 constructs using this design are compatible with any parasite strain background. Upon transgene  
17 insertion, this linear plasmid can be rescued into a BAC, and used to generate parasite lines in  
18 which the BAC is episomally maintained or chromosomally integrated (Supplementary Figure  
19 1A).

20

### 21 ***Programmable donor vector contexts for genome editing***

22 **Design 1.** pSN150 is designed to simultaneously facilitate promoter swapping and conditional  
23 regulation of target gene expression by a single TetR aptamer within a user-specified synthetic

1 5'-UTR. In this case, the regulatory module consists of a TetR<sub>T2A</sub>RLuc<sub>T2A</sub>blastisidin S deaminase  
2 cassette (Figure 3). Modification of a target chromosomal locus is achieved by inserting the left  
3 homologous region (LHR) at the FseI site, and the right homologous region (RHR) using some  
4 combination of BsrBI/ApaI, AhdI and BsiWI sites, depending on the N-terminal modification  
5 desired (Supplementary Figure 1B). A modular T2A 'skip peptide' and epitope tag (HA and c-  
6 Myc) region is included immediately downstream of the 5'-UTR aptamer. Translation most  
7 likely initiates using an ATG within the aptamer sequence, and this is expected to produce an 11  
8 amino acid N-terminal leader peptide (Goldfless et al., 2014; 2012). We have previously shown  
9 this does not interfere with proper protein trafficking to organelles (Goldfless et al., 2014).  
10 Nevertheless, we have included the T2A feature to provide the option to force exclusion of this  
11 leader from the mature target protein. Similarly, the epitope tags can be retained or excluded  
12 from the mature protein by user choice. Overall, the modularity built into this region provides the  
13 flexibility to engineer the N-terminus of targeted proteins in a manner compatible with exploring  
14 their function irrespective of subcellular trafficking and compartmentalization. This design  
15 facilitates homology-directed repair of double strand DNA breaks induced by ZFNs or  
16 CRISPR/Cas9 at the target locus. For CRISPR/Cas9 editing, we have included a cassette for  
17 producing the required sgRNA under T7 promoter control (Wagner et al., 2014). This cassette is  
18 easily modified to target a new locus by inserting the required targeting sequence via an I-  
19 PpoI/AflII site. AflII digestion is more efficient, and the preferred option.

20  
21 **Design 2.** pSN053 and pSN054 are intended to extend the possibilities for accessing native gene  
22 loci via manipulation of regions upstream, downstream and within a targeted gene. pSN053 and  
23 pSN054 are easily programmed to allow installation of regulatory aptamers within the 3'UTR

1 only or both 5' - and 3' -*UTRs* to achieve aTc-dependent regulation via a TetR-DOZI-containing  
2 regulatory module. These options reflect our observation that TetR–DOZI, but not TetR, enables  
3 regulated gene expression via aptamers placed in the 3' -*UTR*, and that superior dynamic  
4 regulatory range is achieved when aptamers are dually positioned in the 5' - and 3' -*UTRs*  
5 (Ganesan et al., 2016). This configuration can be reasonably achieved while either preserving  
6 expression from the native promoter or swapping promoters, if desired (Supplementary Figure  
7 1C). More routinely, regulatory TetR aptamers can be introduced only in the 3' -*UTR* of a target  
8 coding sequence (CDS) via the relevant combination of FseI/BsrBI/AsiSI/BsiWI restriction sites  
9 (Supplementary Figure 1D). Modular N-terminal (HA) and C-terminal (FLAG, c-Myc and HA)  
10 epitope tags are preinstalled, allowing for flexible tag selection. A T7 promoter-driven cassette  
11 for producing single guide RNAs (sgRNAs) required for CRISPR/Cas9-mediated genome  
12 editing is preinstalled, and new target binding sites can be rapidly introduced via an I-PpoI/AflII  
13 site. With pSN053, the sgRNA cassette is not integrated into the parasite's chromosome during  
14 editing, while with pSN054, this cassette is chromosomally integrated and can be used as a  
15 barcode to uniquely identify parasite lines via a standardized PCR and either Sanger or Next  
16 Generation Sequencing methods. These linear plasmids or BAC-rescued versions can be used in  
17 Cas9-mediated genome editing applications. Rescued BACs are also suitable for 3' *UTR*  
18 modification achieved by single crossover integration.

19

20 **Increasing flexible options for genome editing in *P. falciparum*.** Our donor vector designs  
21 include the option for sgRNA production to facilitate Cas9-mediated genome editing. In our  
22 original implementation of CRISPR/Cas9 editing technology in *P. falciparum*, we used the  
23 orthogonal T7 RNA polymerase (T7 RNAP) to produce sgRNAs. We co-transfected parasites

1 with a plasmid expressing *SpCas9* and the sgRNA, and a donor vector expressing T7 RNAP and  
2 containing the required homology arms to repair Cas9-induced double strand breaks (Wagner et  
3 al., 2014). We have streamlined this approach to allow simultaneous expression of *SpCas9* and  
4 T7 RNAP from a single pCRISPR<sup>hdhfr</sup> plasmid. T7 RNAP is produced along with the human  
5 DHFR selection marker using a T2A ‘skip peptide’ from a single expression cassette (Figure  
6 4A). pCRISPR<sup>hdhfr</sup> contains an *attP* site to enable *BxbI*-mediated integration into *attB* parasite  
7 lines. We have integrated pCRISPR<sup>hdhfr</sup> into an NF54<sup>attB</sup> strain (Adjalley et al., 2011) to create a  
8 clonal cell line stably expressing *SpCas9* and T7 RNAP proteins (Figure 4B), which can serve as  
9 a convenient background for the various described genome editing outcomes.

10  
11 To validate that the NF54::pCRISPR line is competent for genome editing applications, we  
12 transfected this line with a homology-directed repair vector designed to disrupt the dispensable  
13 *eba175* invasion ligand through insertion of a DSM-1 selectable *ydhodh* expression cassette  
14 (Figure 4C). We recovered viable parasites from independent triplicate transfections. In all cases,  
15 PCR and sequencing analyses confirmed that the expected insertion event into the *eba175* locus  
16 had been successfully achieved (Figure 4D,E and Supplementary Figure 2). Altogether, these  
17 new reagents increase the flexibility with which the *P. falciparum* genome can be edited either  
18 through co-transfection of donor vectors with the pCRISPR<sup>hdhfr</sup> plasmid into a user-specified  
19 parasite strain, or by transfecting donor vectors into established pCRISPR<sup>hdhfr</sup> cell lines.

20  
21 **Linear plasmids facilitate donor vector assembly for engineering the *P. falciparum* genome**  
22 **to enable functional studies**

1 To establish general applicability of this framework for functional genetics in *P. falciparum*, we  
2 sought next to demonstrate successful: (1) assembly of target constructs into the described linear  
3 vectors (pSN150 and pSN053/4, specifically) and successful rescue into BACs; and (2) use of  
4 these vectors to conveniently create genetically engineered parasites compatible with performing  
5 future biological studies aimed at studying parasite gene function in finer detail. We focused  
6 primarily on designs aimed at manipulating native gene loci.

7  
8 **1. Swapping native promoters for TetR aptamer-regulated synthetic promoters using**  
9 **CRISPR/Cas9 genome editing.** The timing and level of global gene expression during blood  
10 stage malaria parasite development is tightly regulated by both transcriptional and post-  
11 transcriptional mechanisms (Bozdech et al., 2003a; Bunnik et al., 2013; Caro et al., 2014; Le  
12 Roch et al., 2003). The ability to perturb both of these gene expression parameters, therefore, can  
13 provide useful insights into how essential cell cycle, metabolic, and other biological processes  
14 are coordinated to ensure proper development. For example, previous work has shown that  
15 temporally ectopic expression of many parasite genes occurs when expression of CCR4-  
16 Associated Factor 1 (CAF1), a key regulator of mRNA metabolism, is disrupted. This resulted in  
17 severely dysregulated expression of genes involved in egress and invasion, and development of  
18 parasites in red blood cell stages was severely impaired (Balu et al., 2011).

19  
20 Therefore, we sought to establish the technical feasibility of engineering several gene loci to  
21 replace native promoters with a non-cognate promoter/5'-UTR regulated by a single TetR  
22 aptamer. We selected five target genes for this proof-of-concept to sample both putatively  
23 essential and dispensable genes: choline kinase (CK; [PF3D7\\_1401800](#)); chloroquine resistance

1 transporter (CRT; [PF3D7\\_0709000](#)); glycogen synthase kinase (GSK3; [PF3D7\\_0312400](#));  
2 hexose transporter (HT; [PF3D7\\_0204700](#)); and thioredoxin reductase (TrxR; [PF3D7\\_0923800](#)).  
3 Except TrxR, these genes were considered to be likely essential in *P. falciparum* based on an  
4 insertional mutagenesis screen (Zhang et al., 2018). In the related *P. berghei*, only HT and CRT  
5 were considered likely essential, while CK, GSK3 and TrxR were dispensable (Bushell et al.,  
6 2017). These data suggest that CRT and HT are likely essential with highest confidence, and that  
7 knocking down their expression would more likely confer losses in parasite fitness and growth.  
8 Even with substantial knockdown, no functional outcome would be expected if CK, GSK3 and  
9 TrxR are dispensable in accordance with the *P. berghei* data. On the other hand, if essential as  
10 suggested by the piggyBAC screen, even modest knockdown levels could result in loss of  
11 parasite fitness.

12  
13 We used a 625 bp fragment derived from the *P. falciparum* calmodulin (Cam) promoter (Crabb  
14 and Cowman, 1996) modified by a single, regulatory TetR aptamer ( $Cam_{625\text{ bp}}^{5'apt}$ ) as the non-  
15 cognate, synthetic promoter/5'-UTR to replace the cognate promoter/5'-UTRs in these  
16 experiments. Relatively few instances of functional 5'-UTR manipulation in *Plasmodium* blood  
17 stages have been reported (Goldfless et al., 2014; Pino et al., 2012). This reflects a combination  
18 of: (1) technical difficulties associated with 5'-UTR engineering using previous approaches; and  
19 (2) the challenge of ensuring quantitatively adequate expression of essential proteins to allow  
20 parasite survival at baseline, and then triggering sufficient protein depletion such that levels fall  
21 below the functional threshold. Using pSN150, we designed and assembled constructs to  
22 exchange the native promoter, and install an HA tag at the expected N-terminus of each target  
23 protein (Figure 5A). Upstream and downstream homologous regions needed for editing the



1 intended locus were PCR amplified from within the native 5'-UTR and target gene, respectively.  
2 To ensure that repair is irreversible and simultaneously preserve the option to use the same donor  
3 vector with alternative sgRNAs, we synthesized recoded DNA segments beginning at the ATG  
4 of the target coding sequence through a region containing several candidate Cas9 target sites.  
5  
6 We co-transfected NF54<sup>attB</sup> parasites with pSN150 donor BACs targeting CK, CRT, GSK3, HT  
7 and TrxR with pCRISPR<sup>hdhfr</sup> in the presence of aTc to generate edited lines. We selected for  
8 either the donor BAC only (BSD) or both donor BAC and pCRISPR (BSD + WR99210), and  
9 successfully recovered transformed parasites using both selection protocols (Figure 5B). This  
10 confirmed suitability of pSN150-derived BACs for generating transgenic parasites, and adequate  
11 production of putatively essential CRT and HT proteins using a non-cognate synthetic promoter.  
12 Using PCR and sequencing, we verified that parasites were edited as expected. For all target  
13 genes, independently of whether the pCRISPR<sup>hdhfr</sup> plasmid was co-selected, we detected the  
14 expected integration events in transgenic lines, but not the parental NF45<sup>attB</sup> (Figure 5C).  
15 Western blot analysis revealed aTc-dependent regulation of CK, CRT, GSK3 and HT protein  
16 expression (Figure 5D). TrxR could not be detected, even though DNA sequencing confirmed  
17 the epitope tag was in-frame with the TrxR coding sequence. This observation is consistent with  
18 the previous studies showing that two isoforms of TrxR are produced: a cytosolic form initiated  
19 from an internal, alternate translation initiation site; and a mitochondrial form resulting from N-  
20 terminal processing of the expected full-length protein (Kehr et al., 2010). Therefore, it is likely  
21 that mature TrxR produced by the parasite excludes the N-terminal epitope tag.

22

1 We compared aTc-dependent growth of these nonclonal engineered parasites. No significant  
2 aTc-dependent difference in relative growth was observed for the engineered CK, GSK3 and  
3 TrxR lines, but growth of the engineered CRT line decreased by ~60% under knockdown  
4 conditions (Figure 5E). For the engineered HT line grown in standard RPMI with 2 mg/mL  
5 glucose, no aTc-dependence in growth was detected. As HT mediates glucose transport, we also  
6 evaluated growth under more limiting glucose conditions. In 0.2 mg/mL glucose there was ~50%  
7 reduction in growth in the absence of aTc (Supplementary Figure 3). These data show that,  
8 consistent with their expected essential functions, conditional knockdown of CRT and HT  
9 expression levels produced measurable reductions in parasite growth. In contrast, no such growth  
10 deficits were detected with the potentially dispensable CK, GSK3 and TrxR knockdown lines.  
11  
12 Given the discordance in data between *P. falciparum* and *P. berghei* with respect to CK and  
13 GSK3 essentiality, we used the pSN150 framework to generate knockouts in *P. falciparum*.  
14 Beginning with the vectors used to modify the 5'-UTRs of CK and GSK3, we preserved the *bsd*  
15 selection cassette, left homologous region and sgRNA cassette, but replaced the fragment  
16 containing the synthetic promoter through to the original right homologous region with a new  
17 right homologous region overlapping with the 3'-UTR of the targeted locus (Figure 6A). We  
18 included a similarly designed construct for TrxR as a control for a non-essential gene, as direct  
19 transposon insertion into the coding sequence at this locus was detected in the *piggyBAC* screen  
20 (Zhang et al., 2018). We transfected linear plasmids, each in duplicate, into the  
21 NF54::pCRISPR<sup>hdhfr</sup> line under BSD selection pressure, since successful homology directed  
22 repair of the target locus will result in chromosomal integration of the BSD resistance to  
23 facilitate selection. In all instances, we recovered BSD-resistant, RLuc positive parasites post-

1 transfection. PCR and sequencing analysis of genomic DNA isolated from these parasites  
2 revealed that successful disruption of the targeted locus had been achieved in all instances  
3 (Figure 6B-D). Thus, consistent with the *P. berghei* data, our findings indicate that CK, GSK3  
4 and TrxR are dispensable during *P. falciparum* blood stage growth.  
5  
6 Altogether, these data indicate that genome engineering using easily-designed pSN150-based  
7 donor vectors and CRISPR/Cas9 methods can be used to efficiently reconfigure promoter/5'-  
8 *UTR* regions in their native chromosomal context. Appropriately selected synthetic promoters  
9 can also be substituted for native promoters to achieve regulated and functionally informative  
10 perturbation of essential target protein expression. Furthermore, pSN150-based donor vectors  
11 can be conveniently reconfigured to create targeted gene deletion vectors that can be used in  
12 conjunction with parasite cell lines stably expressing Cas9 to evaluate gene essentiality. These  
13 easy-to-implement and high-resolution gene deletion manipulations are complementary to  
14 recently-described genome-scale approaches (Bushell et al., 2017; Sidik et al., 2016; Zhang et al.,  
15 2018) as tools to rigorously validate gene essentiality, as highlighted here for CK and GSK3. The  
16 potential to scale up production of these vectors provides opportunities for use in primary screens  
17 implemented with high gene-targeting efficiency and specificity, while introducing well-defined  
18 loss-of-function genetic changes. Such desired outcomes may not be consistently attainable in  
19 random insertional mutagenesis screens, especially if full saturation is not achieved. Altogether,  
20 the combined use of these various approaches will be crucial for most accurately characterizing  
21 essential gene function in *P. falciparum*.

22

1 **2. Native allele modification to install C-terminal epitope tags and regulatory TetR**  
2 **aptamers in 3'-UTR and both 5' - and 3'-UTRs by CRISPR/Cas9 genome editing.** Modifying  
3 the 3'-UTR of genes in their chromosomal contexts permits insertion of epitope tags and  
4 regulatory elements while preserving native timing and similar expression levels associated with  
5 the endogenous promoter. This is desirable in functional studies requiring perturbations in  
6 protein levels that more precisely match physiological expression timing so as to facilitate  
7 elucidation of biological function.

8  
9 To achieve this, we have used pSN053 and/or pSN054 together with CRISPR/Cas9 genome  
10 editing to readily modify diverse loci (Figure 7A and Supplementary Figure 1C and 1D). Here,  
11 we show this by targeting the hexose transporter (HT; [PF3D7\\_0204700](#)), ferrochelatase (FC;  
12 [PF3D7\\_1364900](#)) and a putative amino acid transporter (AAT; [PF3D7\\_0209600](#)) using pSN054-  
13 based donor vectors. Once sgRNAs targeting a site near the 3'-UTR of these genes were selected,  
14 left homologous regions together with a recoded region overlapping the sgRNA target site and  
15 right homologous regions corresponding to part of the 3'-UTR were used to create donor vectors.  
16 These donors were transfected into the NF54::pCRISPR line to generate edited lines that were  
17 verified for appropriate integration at the target site by junctional PCR and sequencing of the  
18 amplified PCR product (Figure 7B). Western blot analysis of the AAT and HT lines showed aTc-  
19 dependent regulation of protein expression (Figure 7C). Despite in-frame integration of the  
20 epitope tag with FC, no tagged FC protein was detected under induced conditions. One possible  
21 explanation is that this protein is not highly expressed, which could be consistent with the low  
22 transcript levels observed across the intraerythrocytic developmental cycle (PlasmoDB.org:  
23 [PF3D7\\_1364900](#)).

1  
2 Inducing knockdown of HT and AAT, and putatively FC produced a range of responses in  
3 parasite growth. For HT, we detected a dramatic loss in parasite viability upon HT depletion,  
4 consistent with an essential role. This effect occurred in standard high glucose concentration (2  
5 mg/mL) media, in contrast to the relatively more subtle glucose concentration-dependent growth  
6 phenotype observed with the regulated, synthetic promoter (Figure 7D and Supplementary  
7 Figure 3). This is consistent with the greater degree of protein knockdown achieved using a 10x  
8 aptamer array within the 3'-UTR (Figure 7C) compared to a single aptamer regulating the  
9 synthetic 5'-UTR (Figure 5D). For AAT, we observed an ~30% decrease in parasite viability  
10 (Figure 7D) after a single replication cycle during which verifiable depletion of detectable  
11 protein occurred (Figure 7C). Interestingly, both *piggyBAC* mutagenesis (Zhang et al., 2018) and  
12 *P. berghei* knockout screens (Bushell et al., 2017) classify this gene as essential, although the  
13 knockdown studies here suggest that acute loss-of-function of this gene induces a fitness cost.  
14 Putative FC depletion through aTc removal did not result in any detectable change in parasite  
15 growth, which would be consistent with the non-essentiality of this protein and *de novo* heme  
16 biosynthesis during blood stage parasite development (Bushell et al., 2017; Ke et al., 2014;  
17 Nagaraj et al., 2013; Rathnapala et al., 2017; Zhang et al., 2018).

18  
19 Even broader utility of pSN053/054 for enabling in-depth functional studies of diverse parasite  
20 genes is underscored by their application in elucidating roles for the claudin-like apicomplexan  
21 microneme protein (CLAMP) ligand in red blood cell invasion (Sidik et al., 2016), aspartate  
22 proteases Plasmepsin IX and X in red blood cell invasion and egress (Nasamu et al., 2017), and  
23 FtsH1 and ATG8 in apicoplast biogenesis/maintenance (Amberg-Johnson et al., 2017; Walczak

1 et al., 2018). In some instances, it can be desirable to achieve even more stringently regulated  
2 knockdown to study biological function using a dual aptamer configuration (Ganesan et al.,  
3 2016). This is readily attained via pSN053/pSN054 (Supplementary Figure 1C), as illustrated  
4 during work defining new, essential roles for the integral membrane protein, EXP2 (Garten et al.,  
5 2018) and Plasmeprin V protease (Polino et al., 2018) beyond their previously described roles in  
6 protein export from the parasite to the red blood cell compartment (de Koning-Ward et al., 2016;  
7 2009).

## 1 CONCLUSIONS

2 We describe a flexible plasmid toolkit that improves the ease with which genome manipulation  
3 of the less genetically tractable but devastating human malarial parasite, *Plasmodium falciparum*,  
4 can be engineered to study gene function. This toolkit leverages the significantly increased  
5 efficiency linear plasmids afford in manipulating large and complex AT-rich DNA sequences  
6 without the undesirable deletions and rearrangements frequently encountered with typically-used  
7 circular bacterial plasmids. We have emphasized modular designs to allow facile and  
8 standardized vector configuration to address a broad variety of functional applications, including  
9 gene complementation, conditional regulation of gene expression, and gene deletions. We have  
10 ensured direct compatibility with CRISPR/Cas9 genome engineering by hardwiring an easily  
11 reprogrammed guide RNA production module into base donor vectors. We have also validated a  
12 pCRISPR plasmid that can be used to transiently or constitutively produce Cas9 when either co-  
13 transfected as a helper plasmid or stably integrated into a desired background strain, respectively.  
14 Importantly, any construct assembled in a linear vector can be ‘rescued’ with high efficiency to a  
15 circular BAC, while keeping AT-rich and repetitive sequences intact. In *P. falciparum*, only  
16 circular DNA is stably maintained episomally, and integrase-mediated site-specific integration is  
17 efficiently achieved from circular DNA. Therefore, this feature extends the approaches  
18 accessible for evaluating gene function in human malarial parasites. Altogether, we anticipate the  
19 toolkit described here will enable more technically robust strategies for high-resolution genome  
20 manipulation to improve our fundamental understanding of malaria parasite biology and enable  
21 applications that can enhance discovery of novel antimalarial therapeutics and disease prevention  
22 strategies.

## 1   **ACKNOWLEDGEMENTS**

2

3   We thank Patrick Guye, Tharathorn Rimchala and Ron Weiss for helpful technical advice and  
4   sharing plasmid reagents. The NF54<sup>attB</sup> cell line was a kind gift from Prof. David A. Fidock,  
5   Columbia University, New York. This research was supported by grants from the National  
6   Institutes of Health Directors New Innovator Award (1DP2OD007124, JCN); NIGMS Center for  
7   Integrative Synthetic Biology (P50 GM098792); NIGMS Biotechnology Training Grant (5-T32-  
8   GM08334, JCW); NIEHS Predoctoral Training Grant (5-T32-ES007020, BAW); and the Bill  
9   and Melinda Gates Foundation grants through the Grand Challenges Exploration initiative  
10  (OPP1132312, JCN), OPP1162467 (JCN) and OPP1158199 (JCN).

11

## 12   **AUTHOR CONTRIBUTIONS**

13   All authors contributed to conceiving and designing experiments. ASN, AF, CFP, BAW and  
14   SMG performed experiments and analyzed data. JCW (pCRISPR plasmid and NF54::pCRISPR  
15   cell line), SJG (pSG372 plasmid) and SMG (pMG69) provided key reagents. ASN, AF, CFP,  
16   and JCN wrote the paper. JCN supervised the research.

17

## 18   **COMPETING INTERESTS**

19   S.J.G and J.C.N. are co-inventors on a patent of the genetically encoded protein-binding RNA  
20   aptamer technology described.



## 1 REFERENCES

- 2
- 3 Adjalley, S.H., Johnston, G.L., Li, T., Eastman, R.T., Ekland, E.H., Eappen, A.G., Richman, A.,  
4 Sim, B.K.L., Lee, M.C.S., Hoffman, S.L., Fidock, D.A., 2011. Quantitative assessment of  
5 *Plasmodium falciparum* sexual development reveals potent transmission-blocking activity by  
6 methylene blue. *Proc Natl Acad Sci USA* 108, E1214–23. doi:10.1073/pnas.1112037108
- 7 Amberg-Johnson, K., Hari, S.B., Ganesan, S.M., Lorenzi, H.A., Sauer, R.T., Niles, J.C., Yeh, E.,  
8 2017. Small molecule inhibition of apicomplexan FtsH1 disrupts plastid biogenesis in human  
9 pathogens. *Elife* 6, 4525. doi:10.7554/eLife.29865
- 10 Balu, B., Maher, S.P., Pance, A., Chauhan, C., Naumov, A.V., Andrews, R.M., Ellis, P.D., Khan,  
11 S.M., Lin, J.-W., Janse, C.J., Rayner, J.C., Adams, J.H., 2011. CCR4-associated factor 1  
12 coordinates the expression of *Plasmodium falciparum* egress and invasion proteins.  
13 *Eukaryotic Cell* 10, 1257–1263. doi:10.1128/EC.05099-11
- 14 Benham, C.J., 1979. Torsional stress and local denaturation in supercoiled DNA. *Proc Natl Acad*  
15 *Sci USA* 76, 3870–3874.
- 16 Bozdech, Z., Llinas, M., Pulliam, B.L., Wong, E.D., Zhu, J.C., DeRisi, J.L., 2003a. The  
17 transcriptome of the intraerythrocytic developmental cycle of *Plasmodium falciparum*. *PLoS*  
18 *Biol* 1, 85–100. doi:10.1371/journal.pbio.0000005
- 19 Bozdech, Z., Zhu, J., Joachimiak, M.P., Cohen, F.E., Pulliam, B., DeRisi, J.L., 2003b.  
20 Expression profiling of the schizont and trophozoite stages of *Plasmodium falciparum* with a  
21 long-oligonucleotide microarray. *Genome Biol* 4, R9.
- 22 Bunnik, E.M., Chung, D.-W.D., Hamilton, M., Ponts, N., Saraf, A., Prudhomme, J., Florens, L.,  
23 Le Roch, K.G., 2013. Polysome profiling reveals translational control of gene expression in  
24 the human malaria parasite *Plasmodium falciparum*. *Genome Biol* 14, R128. doi:10.1186/gb-  
25 2013-14-11-r128
- 26 Bushell, E., Gomes, A.R., Sanderson, T., Anar, B., Girling, G., Herd, C., Metcalf, T.,  
27 Modrzynska, K., Schwach, F., Martin, R.E., Mather, M.W., McFadden, G.I., Parts, L.,  
28 Rutledge, G.G., Vaidya, A.B., Wengelnik, K., Rayner, J.C., Billker, O., 2017. Functional  
29 Profiling of a *Plasmodium* Genome Reveals an Abundance of Essential Genes. *Cell* 170,  
30 260–272.e8. doi:10.1016/j.cell.2017.06.030

- 1 Caro, F., Ahyong, V., Betegon, M., DeRisi, J.L., 2014. Genome-wide regulatory dynamics of  
2 translation in the *Plasmodium falciparum* asexual blood stages. *Elife* 3, 568.  
3 doi:10.7554/eLife.04106
- 4 Carvalho, T.G., Ménard, R., 2005. Manipulating the *Plasmodium* genome. *Curr Issues Mol Biol*  
5 7, 39–55.
- 6 Collins, C.R., Das, S., Wong, E.H., Andenmatten, N., Stallmach, R., Hackett, F., Herman, J.-P.,  
7 Müller, S., Meissner, M., Blackman, M.J., 2013. Robust inducible Cre recombinase activity  
8 in the human malaria parasite *Plasmodium falciparum* enables efficient gene deletion within  
9 a single asexual erythrocytic growth cycle. *Mol Microbiol* 88, 687–701.  
10 doi:10.1111/mmi.12206
- 11 Crabb, B.S., Cowman, A.F., 1996. Characterization of promoters and stable transfection by  
12 homologous and nonhomologous recombination in *Plasmodium falciparum*. *Proc Natl Acad*  
13 *Sci USA* 93, 7289–7294.
- 14 de Koning-Ward, T.F., Dixon, M.W.A., Tilley, L., Gilson, P.R., 2016. *Plasmodium* species:  
15 master renovators of their host cells. *Nat Rev Microbiol* 14, 494–507.  
16 doi:10.1038/nrmicro.2016.79
- 17 de Koning-Ward, T.F., Gilson, P.R., Boddey, J.A., Rug, M., Smith, B.J., Papenfuss, A.T.,  
18 Sanders, P.R., Lundie, R.J., Maier, A.G., Cowman, A.F., Crabb, B.S., 2009. A newly  
19 discovered protein export machine in malaria parasites. *Nature* 459, 945–949.  
20 doi:10.1038/nature08104
- 21 Deitsch, K., Driskill, C., Wellems, T., 2001. Transformation of malaria parasites by the  
22 spontaneous uptake and expression of DNA from human erythrocytes. *Nucleic Acids Res* 29,  
23 850–853.
- 24 Ganesan, S.M., Falla, A., Goldfless, S.J., Nasamu, A.S., Niles, J.C., 2016. Synthetic RNA-  
25 protein modules integrated with native translation mechanisms to control gene expression in  
26 malaria parasites. *Nat Commun* 7, 10727. doi:10.1038/ncomms10727
- 27 Gardner, M.J., Hall, N., Fung, E., White, O., Berriman, M., Hyman, R.W., Carlton, J.M., Pain,  
28 A., Nelson, K.E., Bowman, S., Paulsen, I.T., James, K., Eisen, J.A., Rutherford, K., Salzberg,  
29 S.L., Craig, A., Kyes, S., Chan, M.-S., Nene, V., Shallom, S.J., Suh, B., Peterson, J.,  
30 Angiuoli, S., Pertea, M., Allen, J., Selengut, J., Haft, D., Mather, M.W., Vaidya, A.B.,  
31 Martin, D.M.A., Fairlamb, A.H., Fraunholz, M.J., Roos, D.S., Ralph, S.A., McFadden, G.I.,

- 1 Cummings, L.M., Subramanian, G.M., Mungall, C., Venter, J.C., Carucci, D.J., Hoffman,  
2 S.L., Newbold, C., Davis, R.W., Fraser, C.M., Barrell, B., 2002. Genome sequence of the  
3 human malaria parasite *Plasmodium falciparum*. *Nature* 419, 498–511.  
4 doi:10.1038/nature01097
- 5 Garten, M., Nasamu, A.S., Niles, J.C., Zimmerberg, J., Goldberg, D.E., Beck, J.R., 2018. EXP2  
6 is a nutrient-permeable channel in the vacuolar membrane of *Plasmodium* and is essential for  
7 protein export via PTEX. *Nat Microbiol* 3, 1090–1098. doi:10.1038/s41564-018-0222-7
- 8 Ghorbal, M., Gorman, M., Macpherson, C.R., Martins, R.M., Scherf, A., Lopez-Rubio, J.J., 2014.  
9 Genome editing in the human malaria parasite *Plasmodium falciparum* using the CRISPR-  
10 Cas9 system. *Nat Biotechnol* 32, 819–821. doi:10.1038/nbt.2925
- 11 Gibson, D.G., Young, L., Chuang, R.-Y., Venter, J.C., Hutchison, C.A., III, Smith, H.O., 2009.  
12 Enzymatic assembly of DNA molecules up to several hundred kilobases. *Nat Methods* 6,  
13 343–345. doi:10.1038/nmeth.1318
- 14 Godiska, R., Mead, D., Dhodda, V., Wu, C., Hochstein, R., Karsi, A., Usdin, K., Entezam, A.,  
15 Ravin, N., 2010. Linear plasmid vector for cloning of repetitive or unstable sequences in  
16 *Escherichia coli*. *Nucleic Acids Res* 38, e88. doi:10.1093/nar/gkp1181
- 17 Goldfless, S.J., Belmont, B.J., de Paz, A.M., Liu, J.F., Niles, J.C., 2012. Direct and specific  
18 chemical control of eukaryotic translation with a synthetic RNA-protein interaction. *Nucleic*  
19 *Acids Res* 40, e64–e64. doi:10.1093/nar/gks028
- 20 Goldfless, S.J., Wagner, J.C., Niles, J.C., 2014. Versatile control of *Plasmodium falciparum* gene  
21 expression with an inducible protein-RNA interaction. *Nat Commun* 5, 5329.  
22 doi:10.1038/ncomms6329
- 23 Guye, P., Li, Y., Wroblewska, L., Duportet, X., Weiss, R., 2013. Rapid, modular and reliable  
24 construction of complex mammalian gene circuits. *Nucleic Acids Res* 41, e156.  
25 doi:10.1093/nar/gkt605
- 26 Jones, M.L., Das, S., Belda, H., Collins, C.R., Blackman, M.J., Treeck, M., 2016. A versatile  
27 strategy for rapid conditional genome engineering using loxP sites in a small synthetic intron  
28 in *Plasmodium falciparum*. *Sci Rep* 6, 21800. doi:10.1038/srep21800
- 29 Ke, H., Sigala, P.A., Miura, K., Morrissey, J.M., Mather, M.W., Crowley, J.R., Henderson, J.P.,  
30 Goldberg, D.E., Long, C.A., Vaidya, A.B., 2014. The Heme Biosynthesis Pathway is

- 1 Essential for Plasmodium falciparum Development in Mosquito Stage but not in Blood  
2 Stages. *J Biol Chem*. doi:10.1074/jbc.M114.615831
- 3 Kehr, S., Sturm, N., Rahlfs, S., Przyborski, J.M., Becker, K., 2010. Compartmentation of redox  
4 metabolism in malaria parasites. *PLoS Pathog* 6, e1001242.  
5 doi:10.1371/journal.ppat.1001242
- 6 Le Roch, K.G., Zhou, Y., Blair, P.L., Grainger, M., Moch, J.K., Haynes, J.D., la Vega, de, P.,  
7 Holder, A.A., Batalov, S., Carucci, D.J., Winzeler, E.A., 2003. Discovery of gene function  
8 by expression profiling of the malaria parasite life cycle. *Science* 301, 1503–1508.  
9 doi:10.1126/science.1087025
- 10 Nagaraj, V.A., Sundaram, B., Varadarajan, N.M., Subramani, P.A., Kalappa, D.M., Ghosh, S.K.,  
11 Padmanaban, G., 2013. Malaria parasite-synthesized heme is essential in the mosquito and  
12 liver stages and complements host heme in the blood stages of infection. *PLoS Pathog* 9,  
13 e1003522. doi:10.1371/journal.ppat.1003522
- 14 Nasamu, A.S., Glushakova, S., Russo, I., Vaupel, B., Oksman, A., Kim, A.S., Fremont, D.H.,  
15 Tolia, N., Beck, J.R., Meyers, M.J., Niles, J.C., Zimmerberg, J., Goldberg, D.E., 2017.  
16 Plasmepsins IX and X are essential and druggable mediators of malaria parasite egress and  
17 invasion. *Science* 358, 518–522. doi:10.1126/science.aan1478
- 18 Nkrumah, L.J., Muhle, R.A., Moura, P.A., Ghosh, P., Hatfull, G.F., Jacobs, W.R., Fidock, D.A.,  
19 2006. Efficient site-specific integration in Plasmodium falciparum chromosomes mediated  
20 by mycobacteriophage Bxb1 integrase. *Nat Methods* 3, 615–621. doi:10.1038/nmeth904
- 21 Pfander, C., Anar, B., Schwach, F., Otto, T.D., Brochet, M., Volkmann, K., Quail, M.A., Pain,  
22 A., Rosen, B., Skarnes, W., Rayner, J.C., Billker, O., 2011. A scalable pipeline for highly  
23 effective genetic modification of a malaria parasite. *Nat Methods* 8, 1078–1082.  
24 doi:10.1038/nmeth.1742
- 25 Pino, P., Sebastian, S., Kim, E.A., Bush, E., Brochet, M., Volkmann, K., Kozlowski, E., Llinás,  
26 M., Billker, O., Soldati-Favre, D., 2012. A tetracycline-repressible transactivator system to  
27 study essential genes in malaria parasites. *Cell Host Microbe* 12, 824–834.  
28 doi:10.1016/j.chom.2012.10.016
- 29 Polino, A.J., Armiyaw, S.N., Niles, J.C., Goldberg, D.E., 2018. Assessment of biological role  
30 and insight into druggability of the Plasmodium falciparum protease plasmepsin V. *bioRxiv*  
31 10, 426486. doi:10.1101/426486

- 1 Prommana, P., Uthaipibull, C., Wongsombat, C., Kamchonwongpaisan, S., Yuthavong, Y.,  
2 Knuepfer, E., Holder, A.A., Shaw, P.J., 2013. Inducible knockdown of Plasmodium gene  
3 expression using the glmS ribozyme. PLoS ONE 8, e73783.  
4 doi:10.1371/journal.pone.0073783
- 5 Rathnapala, U.L., Goodman, C.D., McFadden, G.I., 2017. A novel genetic technique in  
6 Plasmodium berghei allows liver stage analysis of genes required for mosquito stage  
7 development and demonstrates that de novo heme synthesis is essential for liver stage  
8 development in the malaria parasite. PLoS Pathog 13, e1006396.  
9 doi:10.1371/journal.ppat.1006396
- 10 Sidik, S.M., Huet, D., Ganesan, S.M., Huynh, M.-H., Wang, T., Nasamu, A.S., Thiru, P., Saeij,  
11 J.P.J., Carruthers, V.B., Niles, J.C., Lourido, S., 2016. A Genome-wide CRISPR Screen in  
12 Toxoplasma Identifies Essential Apicomplexan Genes. Cell 166, 1423–1435.e12.  
13 doi:10.1016/j.cell.2016.08.019
- 14 Straimer, J., Lee, M.C.S., Lee, A.H., Zeitler, B., Williams, A.E., Pearl, J.R., Zhang, L., Rebar,  
15 E.J., Gregory, P.D., Llinás, M., Urnov, F.D., Fidock, D.A., 2012. Site-specific genome  
16 editing in Plasmodium falciparum using engineered zinc-finger nucleases. Nat Methods 9,  
17 993–998. doi:10.1038/nmeth.2143
- 18 Wagner, J.C., Goldfless, S.J., Ganesan, S.M., Lee, M.C., Fidock, D.A., Niles, J.C., 2013. An  
19 integrated strategy for efficient vector construction and multi-gene expression in  
20 Plasmodium falciparum. Malar J 12, 373. doi:10.1186/1475-2875-12-373
- 21 Wagner, J.C., Platt, R.J., Goldfless, S.J., Zhang, F., Niles, J.C., 2014. Efficient CRISPR-Cas9-  
22 mediated genome editing in Plasmodium falciparum. Nat Methods 11, 915–918.  
23 doi:10.1038/nmeth.3063
- 24 Walczak, M., Ganesan, S.M., Niles, J.C., Yeh, E., 2018. ATG8 Is Essential Specifically for an  
25 Autophagy-Independent Function in Apicoplast Biogenesis in Blood-Stage Malaria Parasites.  
26 MBio 9, e02021–17. doi:10.1128/mBio.02021-17
- 27 WHO, 2017. World Malaria Report 2017.
- 28 Zhang, M., Wang, C., Otto, T.D., Oberstaller, J., Liao, X., Adapa, S.R., Udenze, K., Bronner,  
29 I.F., Casandra, D., Mayho, M., Brown, J., Li, S., Swanson, J., Rayner, J.C., Jiang, R.H.Y.,  
30 Adams, J.H., 2018. Uncovering the essential genes of the human malaria parasite

1 Plasmodium falciparum by saturation mutagenesis. Science 360, eaap7847.

2 doi:10.1126/science.aap7847

3

## 1   **METHODS**

2

3   **Molecular biology and plasmid construction.** The methods used to assemble the vectors  
4 reported in this study are included as Supplementary Methods. These are described in step-by-  
5 step detail to allow users with basic knowledge of molecular cloning to easily build constructs in  
6 the pSN150, pSN154 and pSN053/054 contexts.

7

8   **Parasite culturing and transfection.** *P. falciparum* strain 3D7 parasites were grown under 5%  
9 O<sub>2</sub> and 5% CO<sub>2</sub> in RPMI-1640 media supplemented with 5 g/L Albumax II (Life Technologies),  
10 2 g/L sodium bicarbonate, 25 mM HEPES pH 7.4 (pH adjusted with potassium hydroxide), 1  
11 mM hypoxanthine and 50 mg/L gentamicin. Transfections were performed using the red blood  
12 cell preloading method as described previously (Deitsch et al., 2001). Briefly, 50-100 µg of  
13 purified plasmid DNA were mixed with human red blood cells in 0.2 cm cuvettes and subjected  
14 to 8 square wave electroporation pulses of 365 V for 1 ms each, separated by 0.1 s. The DNA  
15 preloaded red blood cells were inoculated with schizont-stage parasites (e.g. NF54<sup>attB</sup>,  
16 NF54::pCRISPR) to achieve starting parasitemias  $\leq 1\%$  in RPMI 1640 Complete media.  
17 Beginning 4 days post-transfection, cultures were selected with either 2.5 µg/mL Blasticidin  
18 (RPI Corp, B12150-0.1) or a combination of 2.5 µg/mL Blasticidin and 2.5 nM WR99210  
19 (Jacobus Pharmaceuticals). In knockout experiments performed on the NF54::pCRISPR  
20 background, parasites were selected with 1.5 µM DSM1 (MR4) only beginning on Day 4 post-  
21 transfection. For creating knockdown lines using pSN150 and pSN053/54 vectors, 500 nM  
22 anhydrotetracycline (aTc; Sigma-Aldrich, 37919) was included at the beginning of transfections  
23 and maintained throughout. Transfection progress was monitored using Giemsa-stained smears  
24 and *Renilla* luciferase measurements. High purity genomic DNA was isolated using the Blood &

1 Cell Culture DNA Mini Kit (Qiagen 13323) according to the manufacturer's instructions.

2 Cultured cells were lysed under denaturing conditions, and Proteinase K was added to degrade

3 proteins. The suspension was loaded onto a sterile Qiagen Genomic tip. After the recommended

4 incubation period, the sample was centrifuged and the supernatant discarded. Following a wash

5 step, the silica membrane was transferred to a new snap cap, safe lock microcentrifuge tube and

6 distilled, deionized water or TE buffer used to elute DNA. Modification of the target locus was

7 determined by PCR using appropriate locus-specific primers (Supplementary Methods).

8

9 **Western blotting analysis.** Western blotting for *SpCas9* and T7 RNAP was described

10 previously (Wagner et al., 2014). To determine regulation of target protein expression by the

11 TetR- or TetR-DOZI-aptamer system, parasites cultured with 0 nM or 50 nM aTc for 72 h were

12 saponin-lysed, washed with 1x PBS, and proteins solubilized in lysis buffer containing

13 4% sodium dodecyl sulfate (SDS) and 0.5% Triton X-114 in 1x PBS. Protein extracts were

14 mixed with loading buffer containing SDS and dithiothreitol (DTT) and loaded onto Mini-

15 PROTEAN® TGX™ Precast Gels (4-15% gradient; Bio-Rad 4561084) in Tris-Glycine buffer.

16 After separation by polyacrylamide gel electrophoresis (PAGE), proteins were transferred to a

17 polyvinylidene fluoride (PVDF) membrane using the Mini Trans-Blot Electrophoretic Transfer

18 Cell system (Bio-Rad) per the manufacturer's instructions and blocked with 100 mg/mL skim

19 milk in 1x TBS/Tween 20. PVDF membrane-bound proteins were first probed with mouse anti-

20 HA (1:3000; Sigma, H3663) and rabbit anti-GAPDH (1:5000; Abcam, AB9485) primary

21 antibodies and anti-mouse (1:5000; Thermo Fisher Scientific, 62-6520) and anti-rabbit (1:5000;

22 Cell Signaling, 7074S) horseradish peroxidase (HRP)-conjugated secondary antibodies.

23 Following incubation in SuperSignal® West Pico Chemiluminescent substrate (Thermo Fisher



1 Scientific, PI34080), protein blots were imaged and analysed using the ChemiDoc™ MP System  
2 and Image Lab 5.2.0 (Bio-Rad).

3  
4 **Luciferase and quantitative growth assays.** Luciferase assays to track transfection progress  
5 and to measure aTc-dependent regulation of a firefly reporter were performed as previously  
6 described (Ganesan et al., 2016; Wagner et al., 2013) using the Dual-Luciferase Reporter®  
7 Assay System (Promega, E1910), Renilla Luciferase Assay System (Promega, E2810) or  
8 Renilla-Glo® Luciferase Assay System (Promega E2750) per manufacturer's protocols.

9 Quantitative growth assays were performed in 96-well U-bottom plates (Corning® 62406-121)  
10 using synchronous ring-stage parasites set up in triplicate and cultured in the 0 nM or 50 nM aTc.  
11 Relative growth was determined using luciferase levels measured at 0 h (initial setup values) and  
12 after 72 h using the GloMax® Discover Multimode Microplate Reader (Promega).

13 Luminescence values were normalized to samples treated with a lethal dose of chloroquine  
14 (200 nM) as no growth. Data was analyzed using GraphPad Prism (version 8; GraphPad  
15 Software). For GSK3 knockdown experiments, parasite growth was determined by FACS  
16 analysis using an Accuri Flow Cytometer (BD Biosciences). Parasites were stained for nucleic  
17 acid content with 1 µM SYTO 61 (Life Technologies) and analyzed in the FL4 signal channel to  
18 determine the fraction of parasitized red blood cells (parasitemia).

19  
20 For comparing the functional HT regulation achieved using the pSN150 and pSN054  
21 configurations, we measured the expansion of synchronous ring stage parasites after a 72 h  
22 period of growth. Assays were set up at various initial parasitemias (0.1%, 0.5% and 1.5%) in  
23 various glucose (0.2, 0.8, 1.4 and 2.0 mg/mL) and aTc (0, 1, 3 and 50 nM) concentrations.

- 1 RPMI 1640 without glucose (US Biological, R8999-13) was used as the base medium, with
- 2 supplementation as needed with glucose and aTc.

1 **FIGURES**

2

3 **Figure 1. Proof-of-concept to establish successful transfer of large DNA fragments**

4 **containing interspersed regions of AT-rich regulatory elements to a linear vector**

5 **framework. (A).** The schematic shows 7.5 kb and 9.5 kb fragments to be released from extant

6 circular vectors pSN372 and pMG1847, respectively, for assembly into linear vectors. These

7 fragments contain TetR- or TetR-DOZI-based translation regulation modules and a

8 transcriptional unit in which expression of a FLuc reporter CDS is translationally controlled by

9 TetR aptamers located in either the 5'-UTR only or both 5'- and 3'-UTRs. **(B)** Strategy used to

10 transfer the respective pSN372- and pMG1847-derived fragments into linear plasmids. The

11 original pJAZZ-OC vector (Lucigen) was modified with a multi-cloning site gene block to create

12 pSwing. To facilitate Gibson assembly, pSwing can be digested with restriction enzymes to

13 expose regions homologous to cut pSN372- and pMG1847-derived fragments (red and green).

14 **(C).** Restriction digestion analysis confirming proper topological assembly of pSwing, pSN372L

15 and pSN1847L. For pSN1847L, several plasmids that do not contain the expected insert, and

16 likely corresponding to pSwing, are indicated in red font.

17

18 **Figure 2. Establishing successful rescue of *P. falciparum* regulatory modules assembled in**

19 **linear vectors to BACs. (A)** Schematic of the linear vector rescue process, wherein the linear

20 vector is digested with NotI/I-SceI to expose the SEQ1 and SEQX regions at the ends. The

21 recipient BAC, BigBOB, and pAdapter plasmid are pre-configured such that the SEQ1/SEQ3

22 and SEQ3/SEQX regions can be exposed upon restriction enzyme digestion with PacI and

23 XbaI/XhoI, respectively. The appropriate fragments from the linear plasmid, BigBOB BAC and

24 pAdapter restriction enzyme digestions are mixed and assembled in a single pot, 3-piece Gibson

1 reaction. **(B)** Restriction enzyme digestion mapping, illustrated for pSN372R, is used to identify  
2 BACs with the expected topology. Examples of BACs isolated from transformation of the same  
3 Gibson assembly reaction that were correctly (black font) versus incorrectly (red font) assembled  
4 are shown. **(C)** Renilla luciferase measurements were monitored to successful transfection of *P.*  
5 *falciparum* using rescued BACs. \*Note: Renilla luciferase measurements shown in solid and  
6 dashed lines were made with the Promega Dual-Luciferase and Renilla luciferase Assay  
7 Systems, respectively; **(D)** Comparison of conditional regulation of normalized FLuc expression  
8 from plasmid and BAC contexts for pSN372 and pSN1847. Data are the mean of  $n = 3 \pm$   
9 standard deviation for each condition. \*  $p \leq 0.05$  by Student's t-test.

10

11 **Figure 3. Overview of key base vectors pSN150, pSN154, pSN053 and pSN054.** These can be  
12 used for enabling various modifications to native *P. falciparum* gene loci using integrase or  
13 CRISPR/Cas9 genome engineering methods described in detail in the main text.

14

15 **Figure 4. Validation of a pCRISPR plasmid reagent for CRISPR/Cas9-mediated genome**  
16 **engineering via transient or constitutive *SpCas9* expression.** **(A)** The pCRISPR plasmid  
17 allows constitutive expression of *SpCas9* from the CAM 5'-UTR/hsp86 3'-UTR transcription  
18 unit. Through use of a T2A “skip peptide”, both the human dihydrofolate reductase (*hdhfr*)  
19 selectable marker and T7 RNA polymerase for sgRNA transcription are expressed from the  
20 *PcDT* 5'-UTR/hsp2 3'-UTR transcription unit. The 2x *attP* sites allow for *Bxb1*-mediated  
21 integration into a chromosomal *attB* site previously engineered into a host parasite strain.  
22 Successful integration of pCRISPR plasmid at the *cg6* locus in an NF54::pCRISPR parasite line  
23 was confirmed by PCR analysis. **(B)** Western blot analysis to detect expression of *SpCas9* (anti-

1 FLAG) and T7 RNA polymerase (anti-Myc) proteins by the NF54::pCRISPR parasite. (C)  
2 Schematic of the donor vector used to disrupt the dispensable *eba175* gene, and configuration of  
3 the *eba175* locus in the NF54::pCRISPR line pre- and post-editing. The donor vector contained  
4 left and right homologous regions from *eba175* flanking a selectable *ydhodh* expression cassette,  
5 and a T7 RNAP-transcribed cassette for expression of the sgRNA targeting *eba175*. (D) PCR  
6 analysis to detect the 5'- and 3'-integration junctions in edited lines using the primer pairs *p1+p2*  
7 and *p3+p4*, respectively. (E) Sanger sequencing data for the 5'- and 3'-integration junction PCR  
8 products obtained from the knockout transfection replicate, R3.

9  
10 **Figure 5. Manipulating 5'-UTRs of native loci using BAC-rescued pSN150 donor vectors**  
11 **and CRISPR/Cas9 genome editing.** (A) Generalized schematic of CRISPR/Cas9-mediated  
12 modification of a target locus to install a synthetic 5'UTR regulated by a single TetR-binding  
13 aptamer, an N-terminal HA tag and an expression cassette producing TetR, *Renilla* luciferase  
14 (RL) and the Blasticidin S deaminase selection marker. Engineered parasites were generated by  
15 either co-transfecting donor vectors with the pCRISPR plasmid or transfecting into the  
16 NF54::pCRISPR line described in Figure 4. (B) Successful generation of stable parasite lines  
17 was monitored via *Renilla* luciferase levels, under conditions where only the donor vector was  
18 positively selected (BSD) or both donor vector and pCRISPR plasmids were selected  
19 (BSD+WR99210). (C) gDNA extracted from transgenic parasites analyzed by PCR  
20 demonstrated formation of the expected 5'- and 3'- integration junctions at each targeted locus.  
21 Expected junctional PCR product sizes (5', 3'): *CK* (1.3 kb, 1.7 kb); *CRT* (1.2 kb, 1.6 kb); *GSK3*  
22 (0.84 kb, 1.68 kb); *HT* (1.6 kb, 1.6 kb); and *TrxR* (1.3 kb, 1.7 kb). Marker = 1 kb Plus DNA ladder  
23 (New England Biolabs). (D) Western blot analysis of target protein expression under  $\pm$  aTc

1 conditions. Expected molecular weights of the HA-tagged proteins are: CK = 53.7 kDa; CRT =  
2 50.2 kDa; GSK = 51.6 kDa; and HT = 57.9 kDa. *Note*: HT migrates faster than its expected  
3 molecular weight, but identically when detected by an N- and C-terminal tag (*Figure 7*). **(E)**  
4 Normalized *Renilla* luciferase levels or SYBR Green I staining (GSK3 line only) for parasites  
5 grown in the absence (0 nM) or presence (50 nM) aTc for 72 h. Data represent the mean of  $n = 3$   
6  $\pm$  s.e.m for CK, CRT, HT, and TrxR, and  $n = 2 \pm$  s.e.m for GSK3. \*  $p \leq 0.05$  by Student's t-test.

7  
8 **Figure 6. Linear pSN150 can be used for efficient CRISPR/Cas9-mediated deletion of non-**  
9 **essential *P. falciparum* loci.** **(A)** Schematic of a pSN150 vector configured to delete a target  
10 locus via homology-directed repair after Cas9-induced cleavage mediated by a sgRNA  
11 transcribed from the same vector. **(B-D)** PCR analysis to detect the 5'- and 3'-integration  
12 junctions diagnostic of successfully edited parasite lines using the primer pairs  $p1+p2$  and  
13  $p3+p4$ , respectively.  $p1$  and  $p4$  primers were selected to recognize the CK, TrxR and GSK3 loci  
14 being targeted, while  $p2$  and  $p3$  are common primers that bind, respectively, within the *hrp2* 3'-  
15 *UTR* and *hsp86* 5'-*UTR* common to all pSN150-derived knockout vectors.

16  
17 **Figure 7. Manipulating the 3'-UTRs of native loci using linear pSN054 donor vectors and**  
18 **CRISPR/Cas9 genome editing.** **(A)** Generalized schematic of CRISPR/Cas9-mediated editing  
19 of a target locus to install C-terminal 2x-HA epitope tags, a 10x TetR aptamer array, and a TetR-  
20 DOZI, *Renilla* luciferase and Blasticidin S deaminase expression cassette. Donor vectors were  
21 transformed into the NF54::pCRISPR parasite line to modify targeted loci. **(B)** gDNA extracted  
22 from transgenic parasites analyzed by PCR demonstrated formation of the expected 5'- and 3'-  
23 integration junctions at each targeted locus. Expected junctional PCR product sizes (5', 3'): *AAT*,

1 putative amino acid transporter (1.4 kb, 1.1 kb); FC, ferrochelatase (1.5 kb, 1.2 kb); and HT,  
2 hexose transporter (1.3 kb, 1.4 kb). Marker = 1 kb Plus DNA ladder (New England Biolabs). (C)  
3 Western blot analysis of target protein expression under  $\pm$  aTc conditions. Expected molecular  
4 weights of the 2x HA-tagged proteins are  $AAT = 137.6$  kDa and  $HT = 60.5$  kDa. No HA-tagged  
5 FC protein was detected, even after multiple attempts. *Note*: AAT and HT migrate faster than  
6 expected based on their molecular weights; however, N- and C-terminal tagged HT migrate  
7 identically (*Figure 5*). (D) Normalized *Renilla* luciferase levels for parasites grown in 0 nM or  
8 50 nM aTc for 72 h. Data represent the mean of  $n = 3 \pm$  s.e.m. \*  $p \leq 0.05$  by Student's t-test.

## 1 SUPPLEMENTARY FIGURES

2

3 **Supplementary Figure 1.** Several operations using the pSN vector family for achieving TetR  
4 aptamer-regulated conditional regulation of gene expression after genome editing are  
5 summarized. **(A)** Expressing a transgene from pSN154 rescued into a BAC that is then either  
6 stably maintained as an episome or integrated at a chromosomal *attB* site using the *Bxb1*  
7 integrase. **(B)** Using pSN150 and CRISPR-Cas9 genome editing to swap a native promoter for a  
8 synthetic promoter regulated by a single TetR aptamer in the 5'-*UTR* to conditionally regulate  
9 expression of an endogenous gene from its native chromosomal locus. **(C)** Using pSN053/54 and  
10 CRISPR/Cas9 genome editing to place a gene transcribed by its native promoter under dual TetR  
11 aptamer (5'- and 3'-*UTR* located) conditional regulation by TetR-DOZI. **(D)** Using pSN053/54  
12 and CRISPR/Cas9 genome editing to place a gene transcribed by its native promoter under  
13 conditional regulation by TetR-DOZI via 3'-*UTR* located TetR aptamers.

14

15 **Supplementary Figure 2.** Complete Sanger sequencing traces of the **(A)** 5'- and **(B)** 3'-junction  
16 integration PCR products from the *eba175* knockout parasite line.

17

18 **Supplementary Figure 3.** Growth of parasites in which the HT locus has been engineered to  
19 achieve regulated expression via a non-native, synthetic promoter/5'-*UTR* regulated by a single  
20 TetR aptamer within the transcript's 5'-*UTR* (pSN150) or its native promoter and a 10x aptamer  
21 array positioned within the 3'-*UTR* of the transcript (pSN054). The relative growth of ring stage  
22 parasites inoculated at varying initial parasitemia (0.1%, 0.5% and 1.5%) in media containing a  
23 range of glucose (0.2, 0.8, 1.4 and 2.0 mg/mL) and aTc (0, 1, 3 and 50 nM) concentrations was



- 1 determined after 72 h. Parasite growth was determined by monitoring *Renilla* luciferase levels,
- 2 with the values obtained at 2 mg/mL glucose and 50 nM aTc condition representing maximal
- 3 (100%) growth. Data are the mean  $\pm$  s.d. from one of two independent experiments.

## SUPPLEMENTARY METHODS

### Materials

pJAZZ-OC Not I Vector (Lucigen, Catalog # 43024)  
BigEasy-TSA Electrocompetent Cells (Lucigen, Catalog # 60224)  
BAC-Optimized Replicator™ v2.0 Electrocompetent cells (Lucigen, Catalog # 60210)  
2x Gibson Assembly Master Mix (NEB, Catalog #E5510)  
DNA Polymerase I, Large (Klenow) Fragment (New England Biolabs, Catalog# M0210)  
Restriction enzymes were purchased from New England Biolabs, unless otherwise stated

### Section I. Creating base linear vectors while incorporating components from traditional circular plasmids.

The pJAZZ-OC vector (Lucigen) was converted into the various pSN configurations as summarized in the scheme below (*Supplementary Methods Figure 1*).

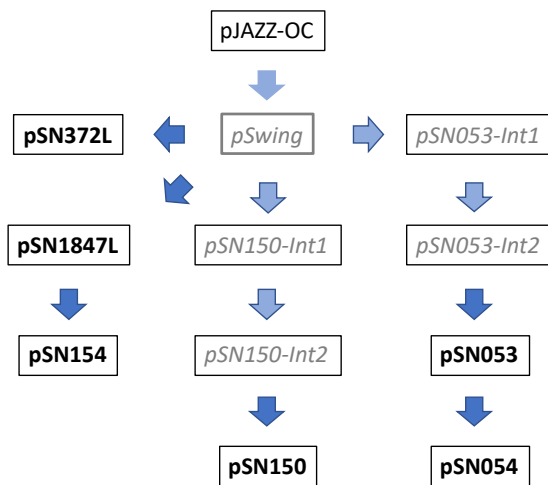

**Supplementary Methods Figure 1. A flow chart summarizing conversion of pJAZZ-OC into the various linear pSN base vectors.** Grey italics and light blue arrows denote intermediate steps en route to final plasmids (boldface and darker blue arrows).

### pSwing construction

pJAZZ-OC Not I Vector (200 ng) was digested with NotI at 37 °C for 90 min and the reaction heat inactivated at 65 °C for 20 min. The pSwing gblock (*Supplementary Methods Figure 2*) containing the unique sequences 1, 3 and X (SEQ1, SEQ3, SEQX) and FseI, SacII and I-SceI restriction sites was obtained from IDT. The digested vector (20 ng) and gblock (20 ng) were mixed with an equal volume of 2x Gibson Assembly Master Mix and incubated at 50 °C for 1 h to assemble an intermediate vector, pSwing. Big Easy TSA cells were transformed with 1 µL Gibson reaction mixture, and plated on LB-agar with chloramphenicol (34 µg/mL) and incubated overnight at 30 °C. Selected colonies were grown overnight in liquid LB supplemented with chloramphenicol (34 µg/mL), mini-prepped and verified by restriction digestion and sequencing.

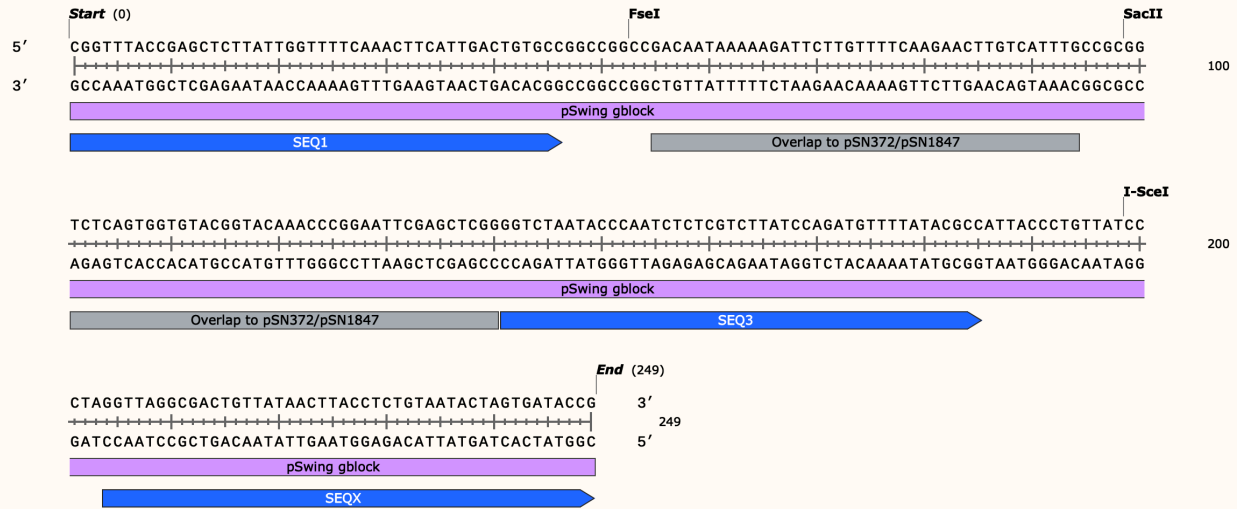

Supplementary Methods Figure 2. pSwing gblock sequence map and features.

### pSN372L and pSN1847L construction

Plasmids pSG372.3 and pMG56 (Ganesan *et al*, 2016) were first modified to produce pSN372 and pSN1847. pSN372 was made by inserting via Gibson assembly: (1) a loxP-containing DNA fragment (tctattattaataaatatggaataacttcgatatagcatacattatacgaagttatccggttagccctcccacacataac; loxP site in bold font and Gibson overlap underlined) via an AgeI site upstream of BSD; and (2) a second loxP-containing fragment (atacctaataagaatataatcttaagataaacttcgatatagcatacattatacgaagttataataaatacctaataacaatccaggccaatccaggcagagaaggtcgatac; loxP site in bold, spacer in italics and Gibson overlap underlined) via an AflIII site downstream of the Cam promoter. pSN1847 was created by performing the second step above on pMG56. Linear pSN372L and pSN1847L were created from their respective pSN372 and pSN1847 circular plasmids. pSwing (200 ng) was digested with SacII at 37 °C for 1.5 h, followed by heat inactivation of enzyme at 65 °C for 20 min. Inserts from pSN372 and pSN1847 were released by ScaI+NotI double digestion at 37 °C for 1 h, followed by heat inactivation of enzymes at 80 °C for 20 min. Released inserts (20 ng) were each mixed with SacII-digested pSwing (20 ng) and an equal volume 2x Gibson Assembly Master Mix, and incubated at 50 °C for 1 h. Big Easy TSA cells were transformed and colonies analyzed as above to isolate pSN372L and pSN1847L (*Supplementary Methods Figure 3A,B*). Mini-prepped plasmids were analyzed for proper assembly by NotI and FseI+AflIII (pSN372L) and AflIII+NotI (pSN1847L) digestions.

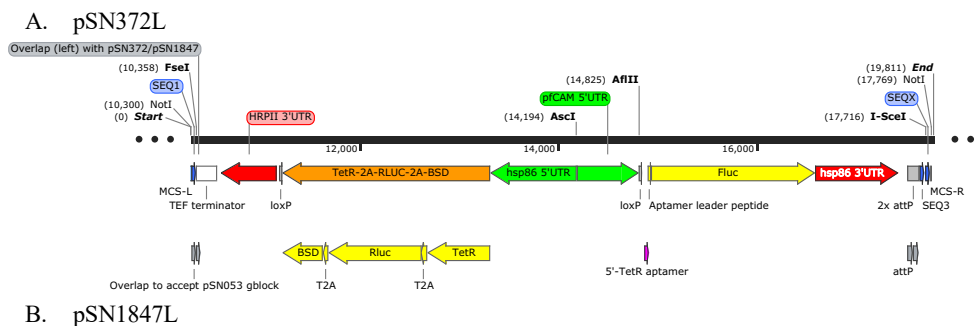

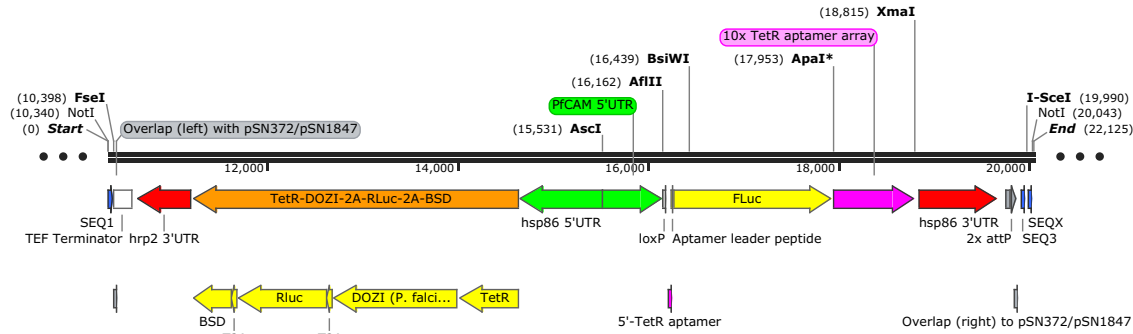

### Supplementary Methods Figure 3. Overview map of (A) pSN372L and (B) pSN1847L. pSN154 construction

The *Firefly* luciferase gene in pSN1847L was removed by AflII+ApaI digestion and replaced with the pSN154-gblock to obtain pSN154 (Supplementary Methods Figure 4A,B).

#### A. pSN154 gblock

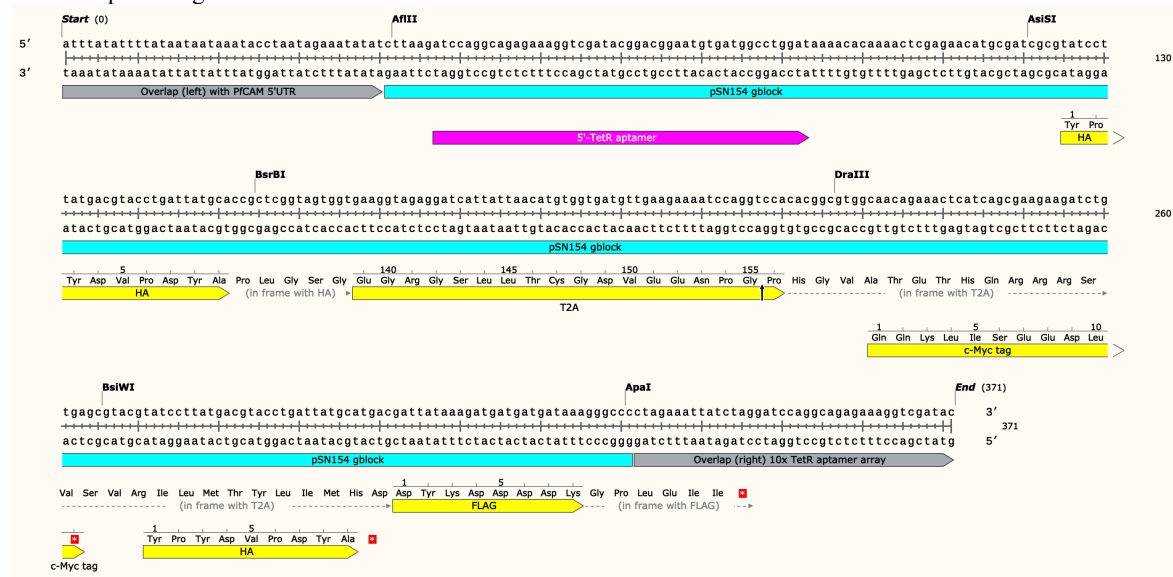

#### B. pSN154

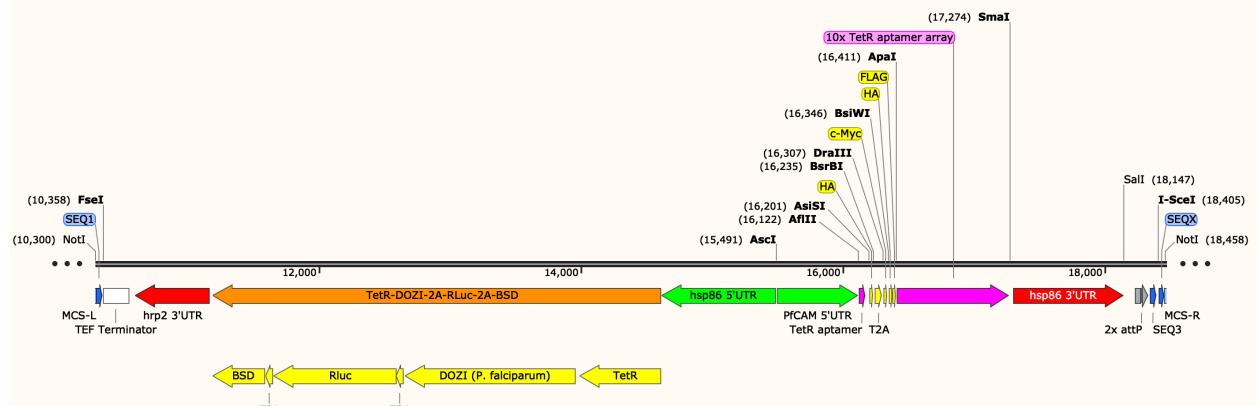

### Supplementary Methods Figure 4. Overview of pSN154 construction. (A) pSN154-gblock sequence and features. (B) Map of final pSN154 plasmid.

### **pSN150 construction**

The pSN150-gblock (IDT) was cloned by Gibson assembly into FseI+SacII-digested pSwing to create pSN150-Int1 (*Supplementary Methods Figure 5A,B*). A SEQ1-(FseI)-*hrp2* 3'UTR-TetR-2A-RLuc-2A-BSD-*hsp86* 5'UTR-(AscI)-*PfCAM* 5'UTR-loxP-TetR aptamer fragment released by NotI+XhoI digestion of pSN372L was cloned by Gibson assembly into FseI-digested pSN150-Int1 to produce pSN150-Int2 (*Supplementary Methods Figure 5C*). Lastly, an sgRNA gblock (IDT) consisting a [5'-cMyc tag]-[T7 promoter]-(I-ppoI/AflIII restriction site)-[sgRNA scaffold]-[T7 terminator]- [3'-HA tag] was installed by Gibson assembly into BsiWI-digested pSN150-Int2 to create pSN150 (*Supplementary Methods Figure 5D*).

### **pSN053 and pSN054 construction**

The pSN053-gblock was cloned by Gibson assembly into FseI+SacII-digested pSwing to yield pSN053-Int1 (*Supplementary Methods Figure 6A,B*). A fragment containing the *hsp86* 5'UTR-TetR-DOZI<sub>2A</sub>-RLuc<sub>2A</sub>BSD-*hrp2* 3'UTR transcription unit was released from pSN1847 by NotI+SacI digestion, and inserted by Gibson assembly into ApaI-digested pSN053-Int1 to yield pSN053-Int2 (*Supplementary Methods Figure 6C*). Lastly, a fragment containing c-Myc-HA-FLAG-10x TetR aptamer-*hsp86* 3'UTR was released from pSN154 by DraIII+Sall digestion and installed by Gibson assembly into SacII-digested pSN053-Int2 to yield pSN053 (*Supplementary Methods Figure 6D*).

To obtain pSN054, I-SceI-digested pSN053 was Gibson assembled with pSN054-conversion gblock to yield pSN054. Thus, pSN054 differs from pSN053 in that the I-SceI site is immediately downstream of SEQ3 and SEQX is deleted (*Supplementary Methods Figure 6E*).

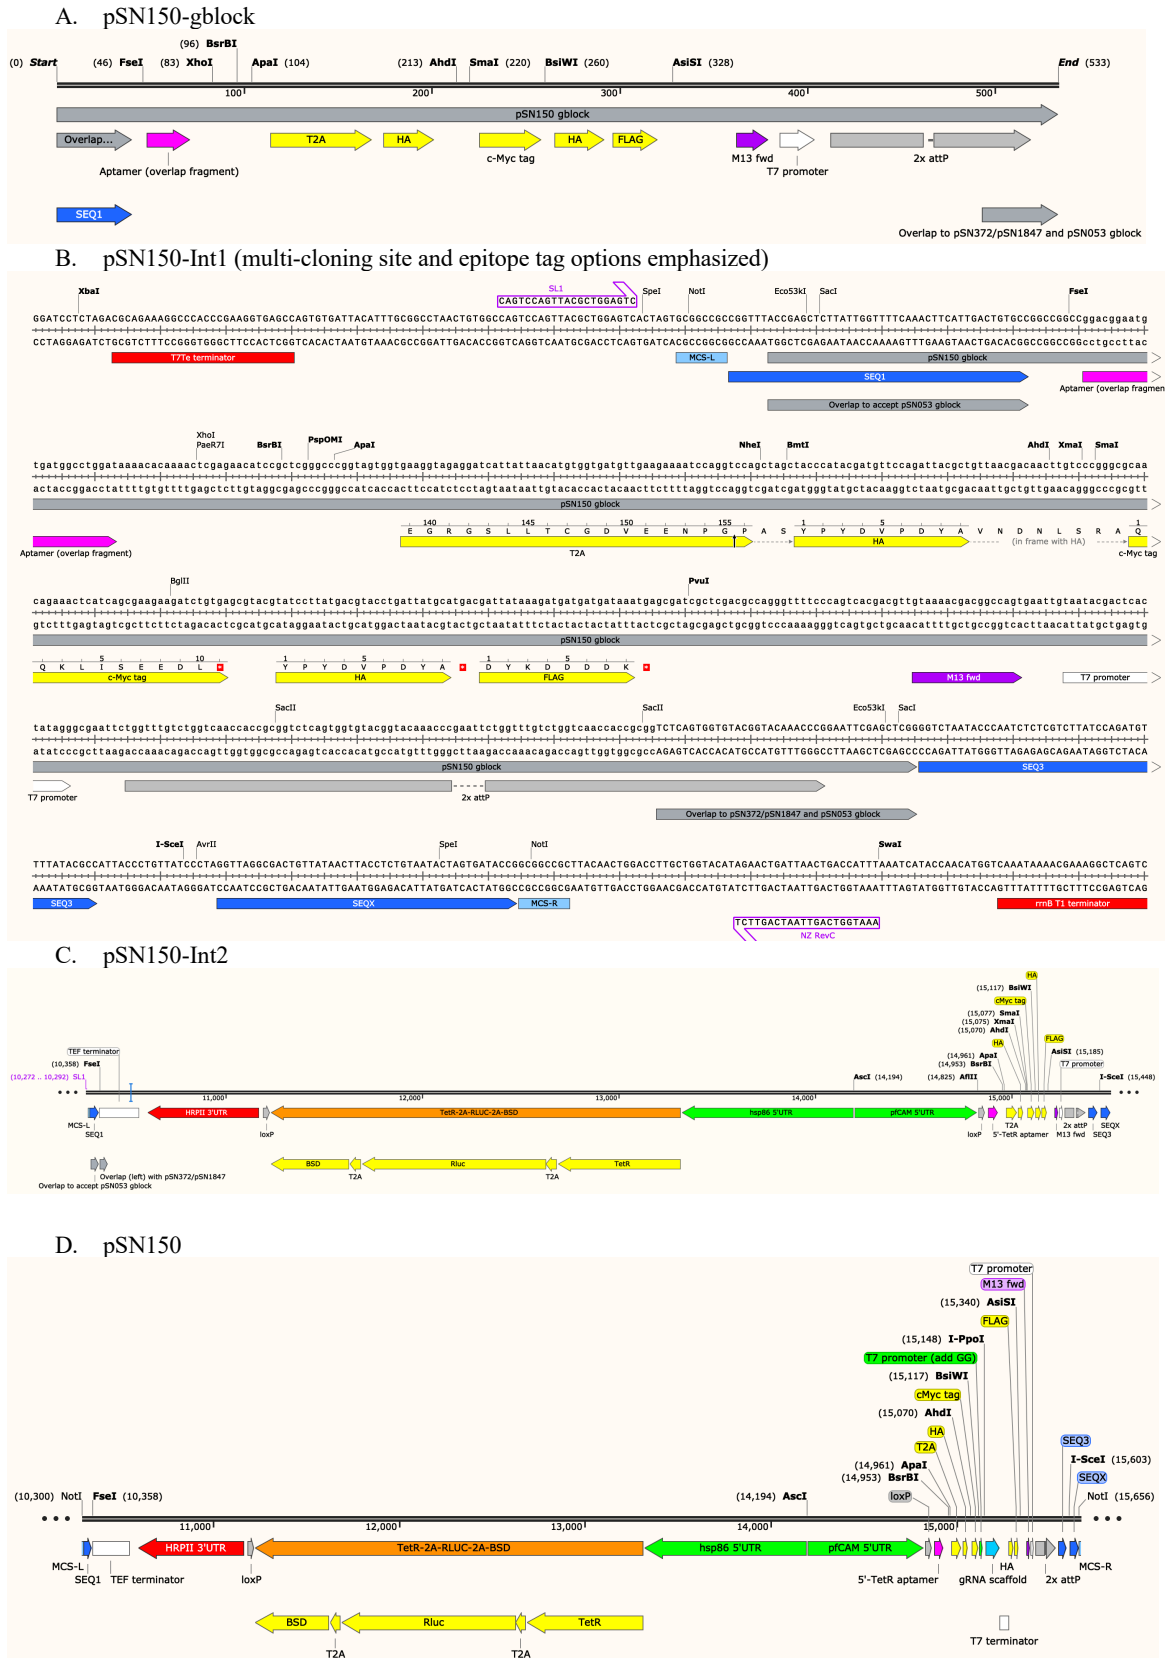

**Supplementary Methods Figure 5. Overview of pSN150 construction.** Key features are shown for (A) pSN150 gblock, (B) pSN150-Int1, (C) pSN150-Int2 and (D) pSN150.

### A. pSN053-gblock

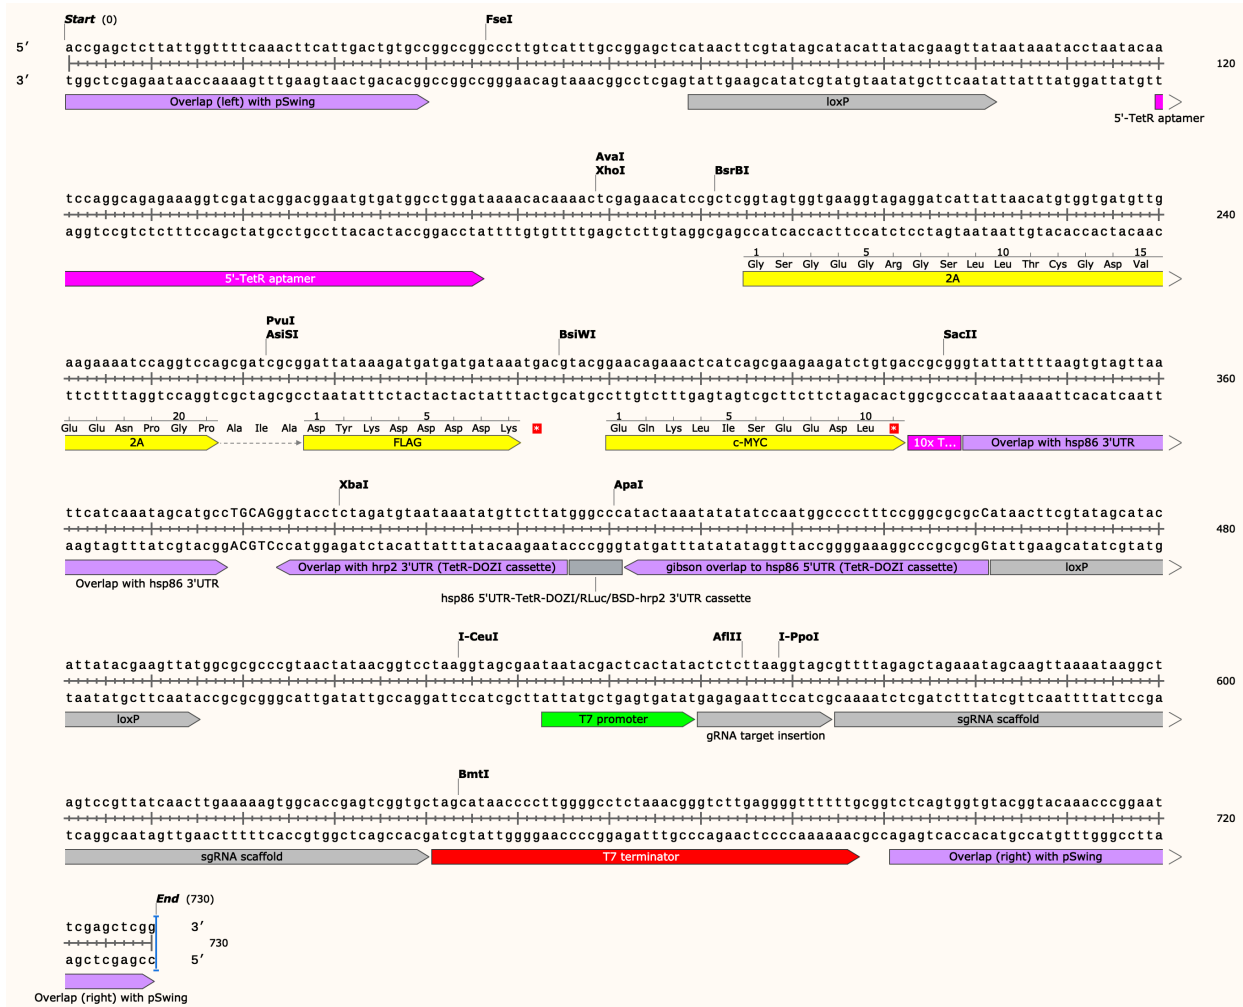

### B. pSN053-Int1

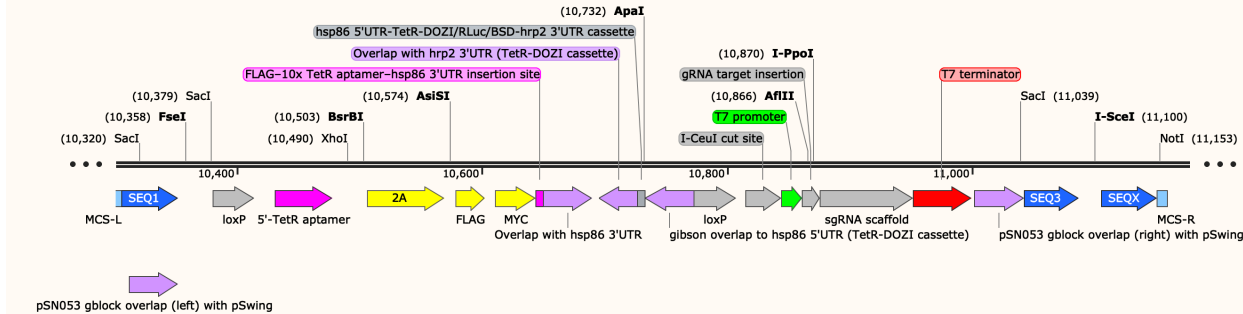

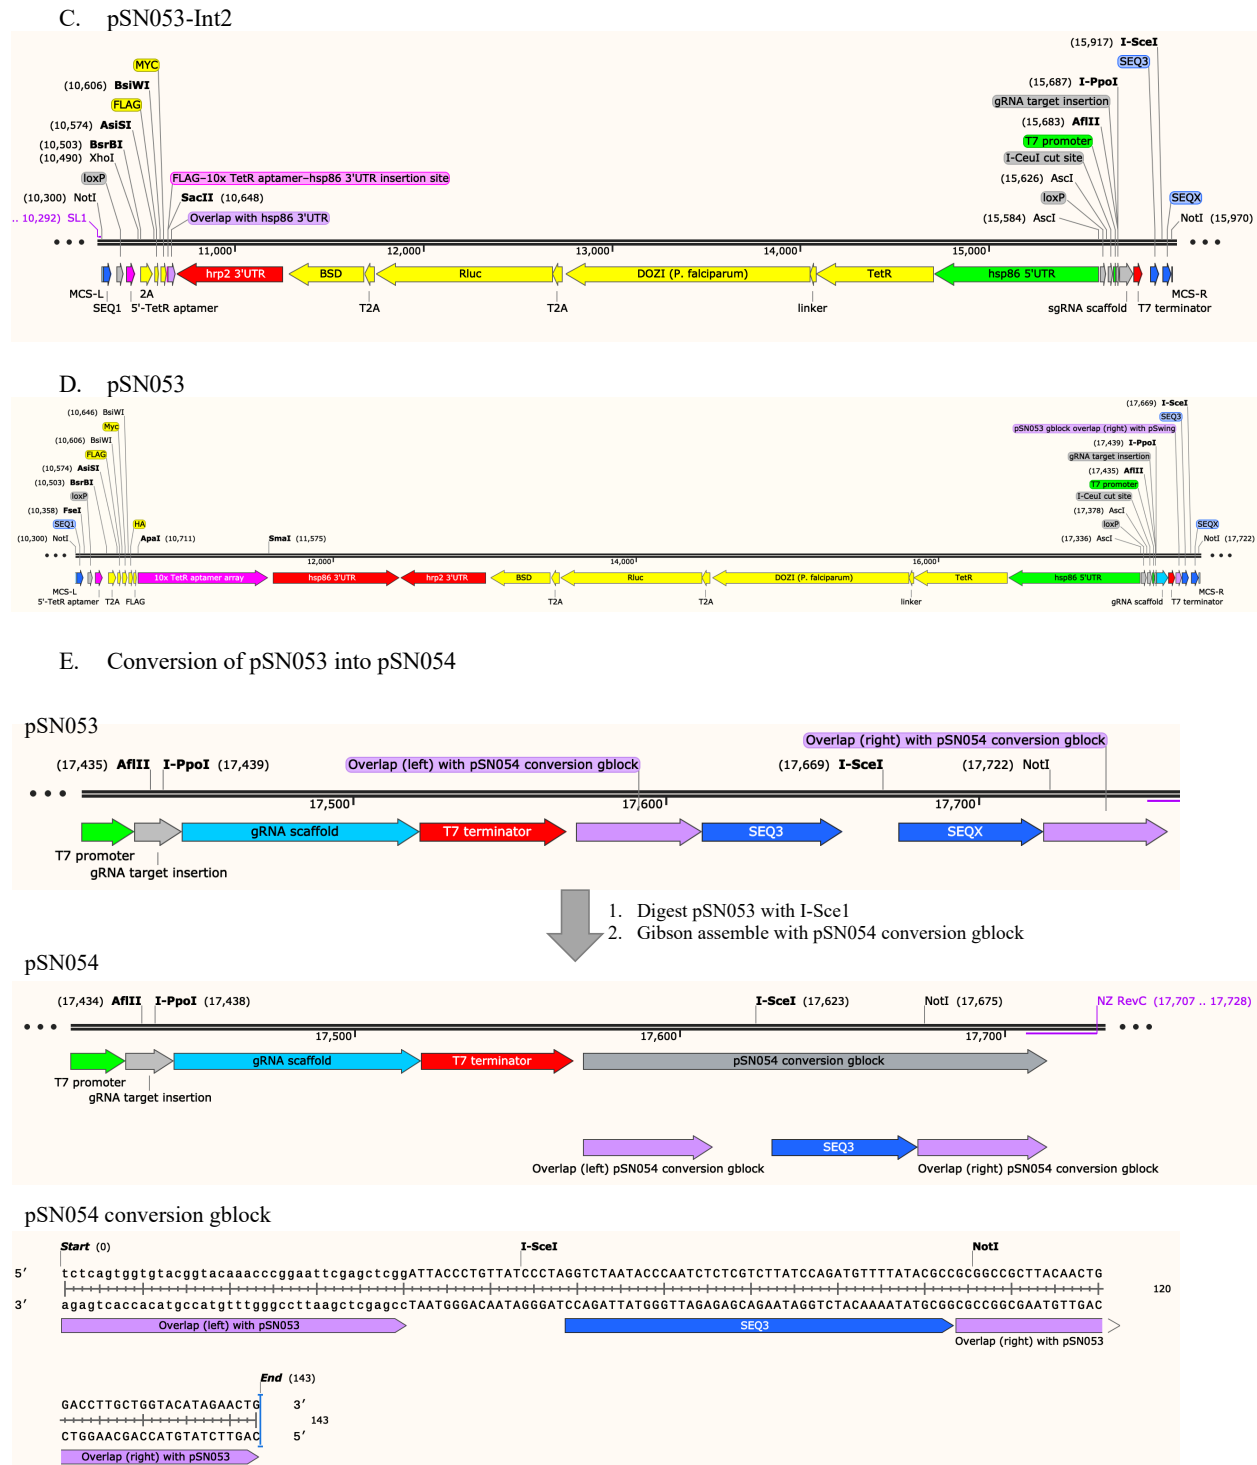

**Supplementary Methods Figure 6. Overview of pSN053/4 construction.** Key features are shown for (A) pSN053 gblock, (B) pSN053-Int-1, (C) pSN053-Int2, (D) pSN053 and (E) pSN053 conversion to pSN054.



## Section 2. Detailed methods for configuring each linear base vector (pSN154, pSN150, pSN053/pSN054) to achieve diverse locus modification outcomes in *P. falciparum*.

### A. Assembling complementation/over-expression vectors for episomal maintenance in pSN154 (Estimated time: 7 days)

#### Day 1

1. Digest 200 ng pSN154 plasmid with the appropriate enzyme depending on one's choice of epitope tag/tags (see table 1) in 10  $\mu$ L at 37 °C for 90 min, followed by heat inactivation of enzymes at the appropriate temperature.

| Restriction enzymes                       | Tag on N-terminus | Tag on C-terminus               |
|-------------------------------------------|-------------------|---------------------------------|
| AsiSI only                                | -                 | HA+T2A                          |
| AsiSI+BsrBI                               | -                 | T2A                             |
| AsiSI+DraIII; BsrBI+DraIII;<br>DraIII     | -                 | cMyc, HA or FLAG                |
| AsiSI+BsiWI; BsrBI+BsiWI;<br>DraIII+BsiWI | -                 | HA or FLAG                      |
| BsrBI                                     | HA                | T2A sequence or none if desired |

2. PCR the full-length gene of interest from genomic DNA (gDNA) or complementary DNA (cDNA) of the *P. falciparum* strain being studied with a high-fidelity polymerase. Gel purify the PCR product. Resuspend to 20 ng/ $\mu$ L in water.
3. Mix 20 ng each of PCR product and digested vector with 3  $\mu$ L 2x Gibson Master Mix and incubate reaction at 50 °C for 1 h.
4. Transform Big Easy TSA cells with 1  $\mu$ L Gibson reaction mixture Transformation conditions: 1 mm cuvette, 10  $\mu$ F, 600 Ohms, 1800 V.
5. Plate on LB-agar with chloramphenicol (34  $\mu$ g/mL) and incubate overnight at 30 °C. [Note: Big Easy TSA cells are ampicillin resistant.]

#### Day 2

Pick 8 colonies and grow overnight at 30 °C in liquid LB media containing chloramphenicol (34  $\mu$ g/mL) and 0.2% w/v arabinose.

#### Day 3

1. Evaluate insertion of the gene of interest with an AflIII and ApaI double digest.
2. Confirm correctly digesting plasmids by sequencing the inserted gene and its flanking sequences.

#### Day 4

1. Digest 200 ng of the linear plasmid with NotI and I-SceI in a 10  $\mu$ L volume at 37 °C for 90 min followed by heat inactivation of enzymes at 80 °C.

2. Digest 200 ng of pBigBOB with PacI and heat inactivate enzyme at 65 °C for 20 min.
3. Digest 200 ng of pAdapter with XhoI and XbaI at 37 °C for 3 h and gel purify the plasmid backbone. Resuspend to 20 ng/μL. **NOTE:** pAdapter confers kanamycin resistance and XhoI cannot be heat inactivated.
4. Incubate 20 ng of each of the digested plasmid containing gene of interest, pBigBOB and pAdapter in a Gibson reaction at 50 °C for 1 h.
5. Transform BAC-Optimized Replicator™ v2.0 Electrocompetent cells with 1 μL Gibson reaction mixture. Transformation conditions: 1 mm cuvette, 10 μF, 600 Ohms and 1800 V.
6. Plate on LB-agar with chloramphenicol (34 μg/mL) and kanamycin (50 μg/mL) and incubate overnight at 30 °C.

#### Day 5

Pick 8 colonies and grow overnight at 30 °C in liquid LB media containing chloramphenicol (34 μg/mL) and kanamycin (50 μg/mL).

#### Day 6

1. Pick colonies and mini-prepare plasmid DNA.
2. Digest with AvrII, PvuI and NotI+XhoI to confirm that the relevant cassettes are present.

## **B. Assembling vectors to engineer promoter and 5'-UTR regions of *P. falciparum* loci using pSN150 (Estimated time: 10 days)**

### **Day 1: Installing recoded coding sequence (CDS) and right homologous regions (RHR).**

1. Digest 200 ng pSN150 plasmid with the desired enzymes below in 10  $\mu$ L at 37 °C for 90 min, followed by heat inactivation of restriction enzyme(s) at 80 °C for 20 min.

| <b>Restriction enzymes</b> | <b>Tag on N-terminus</b> |
|----------------------------|--------------------------|
| BsrBI+AhdI/BsiWI           | None                     |
| AhdI; AhdI+BsiWI           | HA                       |
| BsiWI                      | HA or cMyc               |

2. PCR the RHR from gDNA using a high-fidelity polymerase and gel purify the product. Resuspend to 20 ng/ $\mu$ L.
3. Resuspend synthetic DNA corresponding to recoded CDS region in water to 20 ng/ $\mu$ L.
4. Mix 20 ng each of the RHR, gblock and digested vector with an equal volume 2x Gibson Assembly master mix. Incubate at 50 °C for 1 h.
5. Transform BigEasy-TSA Electrocompetent Cells with 1  $\mu$ L Gibson reaction mixture. Transformation conditions: 1 mm cuvette, 10  $\mu$ F, 600 Ohms, 1800 V.
6. Plate on LB-agar with chloramphenicol (34  $\mu$ g/mL) and incubate overnight at 30 °C.

### **Day 2**

Pick 8 colonies and grow overnight at 30 °C in liquid LB media containing chloramphenicol (34  $\mu$ g/mL) and 0.2% w/v arabinose.

### **Day 3**

1. Mini-prep plasmid DNA and test for insertion of both RHR and recoded DNA segment by restriction digestion with AflIII and BsiWI.
2. Confirm correctly digesting plasmids by DNA sequencing and select the pSN150-RHR intermediate for the next step.

### **Day 4: Installation of the left homologous region (LHR)**

1. Digest 200 ng pSN150-RHR plasmid with FseI in 10  $\mu$ L at 37 °C for 90 min followed by heat inactivation of enzyme at 80 °C for 20 min.
2. PCR the LHR from gDNA using a high-fidelity polymerase and gel purify the product. Resuspend to 20 ng/ $\mu$ L.
3. Mix 20 ng LHR and digested vector with 3  $\mu$ L 2x Gibson Assembly master mix, and incubate at 50 °C for 1 h.
4. Transform Big Easy TSA cells with 1  $\mu$ L Gibson reaction mixture.
5. Plate on LB-agar with chloramphenicol (34  $\mu$ g/mL) and incubate overnight at 30 °C.

### **Day 5**

Pick 8 colonies and grow overnight at 30 °C in liquid LB media containing chloramphenicol (34  $\mu$ g/mL) and 0.2% w/v arabinose.

### **Day 6**

1. Mini-prep plasmid DNA and analyze colonies for LHR insertion NotI+AscI digest and RHR/recoded region retention AflIII+BsiWI digest.
2. Confirm correctly digesting plasmids by sequencing the LHR and select pSN150-LHR-RHR intermediate for the next step.

#### Day 7: Installation of sgRNA into pSN150-LHR-RHR intermediate.

1. Digest 200 ng of the vector with I-ppoI or AflIII.
2. Obtain sgRNA-encoding DNA fragment using complementary primers in a Klenow reaction (see protocol below) or purchase as synthetic DNA fragment. (*Optional*: The Klenow fragment can be agarose gel purified, if needed).
3. Mix 20 ng each sgRNA-encoding DNA and digested pSN150-LHR-RHR vector with 3  $\mu$ L 2x Gibson Assembly master mix and incubate at 50 °C for 1 h.
4. Transform BigEasy-TSA Electrocompetent Cells with 1  $\mu$ L Gibson reaction mixture. Transformation conditions: 1 mm cuvette, 10  $\mu$ F, 600 Ohms, 1800 V.
5. Plate on LB-agar with chloramphenicol (34  $\mu$ g/mL) and incubate overnight at 30 °C.

#### Day 8

Pick 8 colonies and grow overnight at 30 °C in liquid LB media containing chloramphenicol (34  $\mu$ g/mL) and 0.2% w/v arabinose.

#### Day 9

1. Mini-prep plasmid DNA and analyze colonies for sgRNA-encoding DNA insertion by AflIII (or I-ppoI) digest.
2. Sequence sgRNA insert using the T7 promoter or other suitable primer.
3. Confirm retention of inserted LHR and RHR regions using (NotI+AscI) and AflIII+BsiWI restriction digests, respectively, in selected final colonies.

#### Day 10

Maxi-prep plasmid for *P. falciparum* transfection. Plasmids are quite stable during this step. However, as prudent practice, we recommend performing restriction digests as in the previous step to verify the absence of gross deletions/rearrangements.

## C. Assembling donor vectors to achieve gene deletions in *P. falciparum* using pSN150

(Estimated time: 10 days)

### Day 1: Installation of left homologous region (LHR)

1. Digest 200 ng pSN150 plasmid with FseI in 10  $\mu$ L volume at 37 °C for 90 min, followed by heat inactivation of enzyme at 80 °C for 20 min.
2. PCR the LHR from gDNA using a high-fidelity polymerase and gel purify the product. Resuspend to 20 ng/ $\mu$ L.
3. Mix 20 ng each of LHR and digested vector with 3  $\mu$ L 2x Gibson Assembly master mix, and incubate at 50 °C for 1 h.
4. Transform BigEasy-TSA Electrocompetent Cells with 1  $\mu$ L Gibson reaction mixture. Transformation conditions: 1 mm cuvette, 10  $\mu$ F, 600 Ohms, 1800 V.
5. Plate on LB-agar with chloramphenicol (34  $\mu$ g/mL) and incubate overnight at 30 °C.

### Day 2

Pick 8 colonies and grow overnight at 30 °C in liquid LB media containing chloramphenicol (34  $\mu$ g/mL) and 0.2% w/v arabinose.

### Day 3

1. Mini-prep plasmid DNA and test for LHR insertion by restriction digestion with FseI+XbaI (or XbaI alone). [Note. Even though the XbaI site is not unique in this plasmid, digesting with this enzyme will produce a pattern unambiguously identifying LHR insertion.]
2. Confirm correctly digesting plasmids by sequencing the LHR, and select the pSN150-LHR intermediate for the next step.

### Day 4: Installation of right homologous region (RHR)

1. Digest 200 ng pSN150-LHR plasmid with AscI+XmaI in a 10  $\mu$ L at 37 °C for 90 min, followed by heat inactivation of enzymes at 80 °C for 20 min.
2. PCR the RHR from gDNA using a high-fidelity polymerase and gel purify the product. Resuspend to 20 ng/ $\mu$ L.
3. Mix 20 ng each of the RHR fragment and digested vector pSN150-LHR with 3  $\mu$ L 2x Gibson Assembly master mix at 50 °C for 1 h.
4. Transform BigEasy-TSA Electrocompetent Cells with 1  $\mu$ L Gibson reaction mixture. Transformation conditions: 1 mm cuvette, 10  $\mu$ F, 600 Ohms, 1800 V.
5. Plate on LB-agar with chloramphenicol (34  $\mu$ g/mL) and incubate overnight at 30 °C.

### Day 5

Pick 8 colonies and grow overnight at 30 °C in liquid LB media containing chloramphenicol (34  $\mu$ g/mL) and 0.2% w/v arabinose.

### Day 6

1. Mini-prep plasmid DNA and analyze for LHR and RHR insertion FseI+XbaI and AscI+BsiWI digests, respectively.
2. Confirm correctly digesting plasmids by sequencing the RHR, and select pSN150-LHR-RHR intermediate for the next step.

### Day 7: Installation of DNA encoding the sgRNA

1. Digest 200 ng pSN150-LHR-RHR plasmid with I-ppoI (Promega) in 10  $\mu$ L at 37 °C for 90 min, followed by heat inactivation of enzyme at 80 °C for 20 min.
2. Obtain sgRNA-encoding DNA fragment using complementary primers in a Klenow reaction (see protocol below) or purchase as synthetic DNA fragment. (*Optional*: The Klenow fragment can be agarose gel purified, if desired.)
3. Mix 20 ng each of sgRNA-encoding DNA and digested pSN150-LHR-RHR vector with 3  $\mu$ L 2x Gibson Assembly master mix and incubate at 50 °C for 1 h.
4. Transform BigEasy-TSA Electrocompetent Cells with 1  $\mu$ L of the Gibson reaction mixture. Transformation conditions: 1 mm cuvette, 10  $\mu$ F, 600 Ohms, 1800 V.
5. Plate on LB-agar with chloramphenicol (34  $\mu$ g/mL) and incubate overnight at 30 °C.

### Day 8

Pick 8 colonies and grow overnight at 30 °C in liquid LB media containing chloramphenicol (34  $\mu$ g/mL) and 0.2% w/v arabinose.

### Day 9

1. Mini-prep plasmid DNA and analyze for sgRNA-encoding DNA insertion by I-ppoI digest.
2. Sequence digest-positive plasmids to confirm the correct sgRNA sequence using the T7 promoter or AF443 primer.
3. Confirm retention of inserted LHR and RHR regions using FseI+XbaI and AscI+BsiWI restriction digests, respectively, in selected final plasmids.

### Day 10

Maxi-prep final plasmid to obtain DNA for *P. falciparum* transfections. Plasmids are quite stable during this step. However, as prudent practice, we recommend performing restriction digests as in the previous step to verify the absence of gross deletions/rearrangements.

## **D. Assembling donor vectors to engineer the 3'-UTR of *P. falciparum* loci using pSN053/054** (Estimated time: 10 days)

### Day 1: Installation of right homologous region (RHR)

1. Digest 200 ng pSN053/054 plasmid with I-SceI in a 10  $\mu$ L at 37 °C for 90 min, followed by heat inactivation of enzyme at 80 °C for 20 min.
2. PCR the RHR from gDNA using a high-fidelity polymerase and gel purify the product. Resuspend product to 20 ng/ $\mu$ L.
3. Mix 20 ng each of the RHR and digested vector in 3  $\mu$ L 2x Gibson Assembly master mix and incubate at 50 °C for 1 h.
4. Transform BigEasy-TSA Electrocompetent Cells with 1  $\mu$ L Gibson reaction mixture. Transformation conditions: 1 mm cuvette, 10  $\mu$ F, 600 Ohms, 1800 V.
5. Plate on LB-agar with chloramphenicol (34  $\mu$ g/mL) and incubate overnight at 30 °C.

### Day 2

Pick 8 colonies and grow overnight at 30 °C in liquid LB media containing chloramphenicol (34  $\mu$ g/mL) and 0.2% w/v arabinose.

### Day 3

1. Mini-prep plasmid DNA and test for RHR insertion by AflII digestion to look for a shift in size of the smaller part of the plasmid (downstream of AflII).
2. Sequence inserted RHR region for correctly digesting plasmids, and select a pSN053/54-RHR intermediate plasmid for the next step.

### Day 4: Installation of left homologous region (LHR)

1. Digest 200 ng pSN053/53-RHR with FseI+BsrBI, FseI+AsiSI or FseI+BsiWI (to include either a T2A sequence, FLAG or Myc/HA epitope tag, respectively) in 10  $\mu$ L at 37 °C for 90 min, followed by heat inactivation of enzymes at the appropriate temperatures for this enzyme combination.
2. PCR amplify the LHR from gDNA using a high-fidelity polymerase and gel purify. Resuspend to 20 ng/ $\mu$ L.
3. Mix 20 ng each of LHR and digested vector in 3  $\mu$ L 2x Gibson Assembly master mix, and incubate at 50 °C for 1 h.
4. Transform BigEasy-TSA Electrocompetent Cells with 1  $\mu$ L of Gibson reaction mixture. Transformation conditions: 1 mm cuvette, 10  $\mu$ F, 600 Ohms, 1800 V.
5. Plate on LB-agar with chloramphenicol (34  $\mu$ g/mL) and incubate overnight at 30 °C.

### Day 5

Pick 8 colonies and grow overnight at 30 °C in liquid LB media containing chloramphenicol (34  $\mu$ g/mL) and 0.2% w/v arabinose.

### Day 6

1. Mini-prep plasmid DNA and analyze for LHR insertion (NotI+BsiWI digest) and RHR retention (AflII digest- look for a shift in size downstream of AflII).
2. Confirm correctly digesting plasmids by sequencing the LHR, and select pSN150-LHR-RHR intermediate for the next step.

### Day 7: Installation of DNA encoding the sgRNA

1. Digest 200 ng pSN053/054-LHR-RHR plasmid with AflIII or I-ppoI in 10  $\mu$ L at 37  $^{\circ}$ C for 90 min, followed by heat inactivation of enzyme at 80  $^{\circ}$ C for 20 min.
2. Obtain sgRNA-encoding DNA fragment using complementary primers in a Klenow reaction (see protocol below) or purchase as synthetic DNA fragment. *Optional*: The Klenow fragment can be agarose gel purified, if desired.
3. Mix 20 ng each sgRNA-encoding DNA and digested pSN150-LHR-RHR vector with 3  $\mu$ L 2x Gibson Assembly master mix and incubate at 50  $^{\circ}$ C for 1 h.
4. Transform BigEasy-TSA Electrocompetent Cells using 1  $\mu$ L Gibson reaction mixture. Transformation conditions: 1 mm cuvette, 10  $\mu$ F, 600 Ohms, 1800 V.
5. Plate on LB-agar with chloramphenicol (34  $\mu$ g/mL) and incubate overnight at 30  $^{\circ}$ C.

### Day 8

Pick 8 colonies and grow overnight at 30  $^{\circ}$ C in liquid LB media containing chloramphenicol (34  $\mu$ g/mL) and 0.2% w/v arabinose.

### Day 9

1. Mini-prep plasmid DNA and analyze for sgRNA-encoding DNA insertion by AflIII (or I-ppoI) digest.
2. Sequence digest-positive plasmids to verify the sgRNA sequence using T7 promoter or other user-designed primer.
3. Confirm retention of inserted LHR and RHR regions using NotI+BsiWI and AscI+I-SceI restriction digests, respectively, in selected final plasmids.

### Day 10

Maxi-prep final plasmid to obtain DNA for *P. falciparum* transfections. Plasmids are quite stable during this step. However, as prudent practice, we recommend performing restriction digests as in the previous step to verify the absence of gross deletions/rearrangements.



## **E. Assembling donor vectors to achieve dual TetR aptamer-mediated target gene regulation at their native loci using pSN053/054** (*Estimated time: 13 days*)

### **Day 1: Installation of right homologous region (RHR)**

1. Digest 200 ng pSN053/054 plasmid with I-SceI in 10  $\mu$ L at 37 °C for 90 min, followed by heat inactivation of enzyme at 80 °C for 20 min.
2. PCR the RHR from gDNA using a high-fidelity polymerase and gel purify. Resuspend to 20 ng/ $\mu$ L.
3. Mix 20 ng each of RHR and digested vector with 3  $\mu$ L 2x Gibson Assembly master mix and incubate at 50 °C for 1 h.
4. Transform BigEasy-TSA Electrocompetent Cells with 1  $\mu$ L Gibson reaction mixture. Transformation conditions: 1 mm cuvette, 10  $\mu$ F, 600 Ohms, 1800 V.
5. Plate on LB-agar with chloramphenicol (34  $\mu$ g/mL) and incubate overnight at 30 °C.

### **Day 2**

Pick 8 colonies and grow overnight at 30 °C in liquid LB media containing chloramphenicol (34  $\mu$ g/mL) and 0.2% w/v arabinose.

### **Day 3**

1. Mini-prep plasmid DNA and test for RHR insertion by AflII restriction digestion.
2. Sequence inserted RHR region of correctly digesting plasmids, and select a pSN053/54-RHR intermediate plasmid for the next step.

### **Day 4: Installation of left homologous region (LHR)**

1. Digest 200 ng pSN053/054-RHR with FseI in 10  $\mu$ L at 37 °C for 90 min, followed by heat inactivation of enzyme at 80 °C for 20 min.
2. PCR amplify LHR from gDNA using a high-fidelity polymerase and gel purify. Resuspend to 20 ng/ $\mu$ L.
3. Mix 20 ng each of LHR and digested vector in 3  $\mu$ L 2x Gibson Assembly master mix, and incubate at 50 °C for 1 h.
4. Transform BigEasy-TSA Electrocompetent Cells with 1  $\mu$ L Gibson reaction mixture. Transformation conditions: 1 mm cuvette, 10  $\mu$ F, 600 Ohms, 1800 V.
5. Plate on LB-agar with chloramphenicol (34  $\mu$ g/mL) and incubate overnight at 30 °C.

### **Day 5**

Pick 8 colonies and grow overnight at 30 °C in liquid LB media containing chloramphenicol (34  $\mu$ g/mL) and 0.2% w/v arabinose.

### **Day 6**

1. Mini-prep plasmid DNA and analyze colonies for LHR insertion NotI+FseI digest and RHR retention AflII digest.
2. Confirm LHR sequence for correctly digesting plasmids, and select pSN150-LHR-RHR intermediate for the next step.

### **Day 7: Installation of recoded DNA encoding CDS for gene of interest**

1. Digest 200 ng pSN053/054-LHR-RHR vector with BsrBI/AsiSI/BsiWI in 10  $\mu$ L at 37 °C for 90 min, followed by heat inactivation of enzyme(s) at the appropriate temperature for 20 min. See below the epitope tags that can be used based on the restriction enzyme used.

| Restriction enzymes | Tag on N-terminus | Tag on C-terminus |
|---------------------|-------------------|-------------------|
| BsrBI               | none              | FLAG, c-Myc or HA |
| AsiSI               | none              | FLAG, c-Myc or HA |
| BsiWI               | $\pm$ FLAG        | c-Myc or HA       |

2. Resuspend the synthetic gene to 20 ng/ $\mu$ L in water. Note: ensure the synthetic gene has Gibson homology to the left and right Gibson regions.
3. Mix 20 ng each of synthetic gene DNA and digested vector with 3  $\mu$ L 2x Gibson Assembly master mix and incubate at 50 °C for 1 h.
4. Transform BigEasy-TSA Electrocompetent Cells with 1  $\mu$ L of Gibson reaction mixture. Transformation conditions: 1 mm cuvette, 10  $\mu$ F, 600 Ohms, 1800 V.
5. Plate on LB-agar with chloramphenicol (34  $\mu$ g/mL) and incubate overnight at 30 °C.

#### Day 8

Pick 8 colonies and grow overnight at 30 °C in liquid LB media containing chloramphenicol (34  $\mu$ g/mL) and 0.2% w/v arabinose.

#### Day 9

1. Mini-prep plasmid DNA and analyze colonies for insertion of recodonized CDS by BsiWI and NotI digestion. Use the pSN053/054-LHR-RHR plasmid as a control to detect increase in size of diagnostic fragment containing the inserted CDS.
2. Sequence positive clones to verify correct CDS sequence.
3. Confirm retention of LHR and RHR regions using NotI+BsrBI and AflIII restriction digests, respectively.
4. Select pSN053/054-LHR-rCDS-RHR intermediate plasmid for the next step.

#### Day 10: Installation of DNA encoding the sgRNA

1. Digest 200 ng pSN053/054-LHR-rCDS-RHR plasmid with AflIII or I-ppoI in 10  $\mu$ L at 37 °C for 90 min, followed by heat inactivation of enzyme at 80 °C for 20 min.
2. Obtain sgRNA-encoding DNA fragment using complementary primers in a Klenow reaction (see protocol below) or purchase as synthetic DNA fragment. *Optional:* The Klenow fragment can be agarose gel purified, if desired.
3. Mix 20 ng each sgRNA-encoding DNA and digested pSN053/054-LHR-rCDS-RHR vector with 3  $\mu$ L 2x Gibson Assembly master mix and incubate at 50 °C for 1 h.
4. Transform BigEasy-TSA Electrocompetent Cells with 1  $\mu$ L of the Gibson reaction mixture. Transformation conditions: 1 mm cuvette, 10  $\mu$ F, 600 Ohms, 1800 V.
5. Plate on LB-agar with chloramphenicol (34  $\mu$ g/mL) and incubate overnight at 30 °C.

#### Day 11

Pick 8 colonies and grow overnight at 30 °C in liquid LB media containing chloramphenicol (34  $\mu$ g/mL) and 0.2% w/v arabinose.

#### Day 12

1. Mini-prep plasmid DNA and analyze colonies for sgRNA-encoding DNA insertion by AflII (or I-ppoI) digestion.
2. Sequence digest-positive clones to verify correct sgRNA identity using T7 promoter or other user-designed primer.
3. Confirm retention of inserted LHR, rCDS and RHR regions using NotI+BsrBI, BsrBI+XmaI and I-CeuI restriction digests, respectively, in the selected final pSN053-LHR-rCDS-RHR-sgRNA/pSN054-LHR-rCDS-sgRNA-RHR plasmids.

### Day 13

Maxi-prep final plasmids to obtain DNA for *P. falciparum* transfections. Plasmids are quite stable during this step. However, as prudent practice, we recommend performing restriction digests as in the previous step to verify the absence of gross deletions/rearrangements.

## F. Rescuing linear plasmids into BACS (Estimated time: 5 days)

### Day 1

1. Digest 200 ng linear vector construct with I-SceI+NotI at 37 °C for 90 min and inactivate restriction enzymes for 20 min at 80 °C.
2. Overnight digest 200 ng pBigBOB and pAdapter with PacI and XhoI+XbaI, respectively, in 10 µL reactions at 37 °C, followed by heat inactivation of enzymes at 80 °C for 20 min. Perform all reactions in 10ul volumes. **Note:** Since pAdapter and pBigBoB are used in all rescue reactions, larger scale preparations can be performed. Digested vectors stored at -20 °C for future experiments.

### Day 2

1. Combine 1 µL each of digested linear plasmid, pAdapter and pBigBoB with 3 µL 2x Gibson Assembly Master Mix and incubate at 50 °C for 1 h.
2. Transform BAC-Optimized Replicator™ v2.0 Electrocompetent cells with 1 µL Gibson reaction.
3. Plate on LB-agar with chloramphenicol (34 µg/mL) and kanamycin (50 µg/mL) and incubate overnight at 30 °C.

### Day 3

Pick 8 colonies and grow overnight at 30 °C in liquid LB media containing chloramphenicol (34 µg/mL) and kanamycin (50 µg/mL)

### Day 4

1. Mini-prep BAC DNA and test for insertion of the fragment released from the linear vector during I-SceI+NotI digestion (Day1, Step 1).
2. Confirm proper overall BAC topology using AvrII, PvuI and NotI/XhoI digests.

### Day 5

Maxi-prep final BAC to obtain DNA for *P. falciparum* transfections. These are quite stable during this step. However, as prudent practice, we recommend repeating restriction digests as in the previous step to verify absence of gross deletions/rearrangements.

**Supplementary Table 1.** Construction of circular pUF-1 knockout vector for disrupting *eba175* locus.

| Description                     | Nucleotide sequence                                          |
|---------------------------------|--------------------------------------------------------------|
| eba175_RHR_F                    | TTCTCAAAAATGAACAATAATTATTCAACTAAGGCAGAAA                     |
| eba175_RHR_R                    | AGTGTAGTTAATTCATCAAATAGCATGCCTGCAGGTCGACAATATTCAGCATCACAATTA |
| eba175_LHR_F                    | TATAGAATACTCAAGCTTGGGGGATCCTCTAGAGTCGACGTTATGGAAGCTCCAGATAAT |
| eba175_LHR_R                    | CCTCTACCTTCAACTACCCATAGCAAGATGTCCATAAT                       |
| eba175_sgRNA target site        | GGAAATGATATGGATTTTGG                                         |
| eba175_LHR integration primer_F | GCTAGGAATGAATATGATATAAAAAGAGAATGAAAAATTTTGTAGACGTG           |
| eba175_LHR integration primer_R | TGATCTATGGATGTATAACCCTTAGCTTCCATTATGTC                       |
| eba175_RHR integration primer_F | TGACAGCCAGTTTAACTACCAAGTTCTTGAAC                             |
| eba175_RHR integration primer_R | CCCACACCTTTGTGTTTGTATCAACGG                                  |

**Supplementary Table 2A.** List of oligonucleotides used to construct pSN150 knockdown donor vectors and validate locus-specific integration in edited *P. falciparum* lines.

| Description                   | Nucleotide sequence                                           |
|-------------------------------|---------------------------------------------------------------|
| CK_RHR_F                      | TGTGTATTTAAATGATGGATAGGTGGAGATTAGCTGTAT                       |
| CK_RHR_R                      | TGATGAGTTTCTGTTGCGCCCGGGACAATTAATCGTCATAATCCTTGATAATATTTTTGG  |
| CK_LHR_F                      | TTTCAAACCTTCATTGACTGTGCCGGCCGGCCGTATGTATCACATAAGTTTTGATTTTATC |
| CK_LHR_R                      | TCTTGAAAACAAGAATCTTTTTATTGCTCTGTTCTATTAGGTGCTAGATACTAATTTTAC  |
| CK_sgRNA target site          | ATGGTGGGCGTATCGAGGAA                                          |
| CK_LHR integration primer_F   | TCAAAGGGAAAACCATAAAATACT                                      |
| CK_RHR integration primer_R   | TTTTTATATCTCCTTCTTTTTCTACATG                                  |
| CRT_RHR_F                     | GGAAATATCCAATCATTTGTTCTTCAATTAAGTATTCC                        |
| CRT_RHR_R                     | CGCTGATGAGTTTCTGTTGCGCCCGGGACAACCTTGTCTGTTTAAAAGCATAACAGGC    |
| CRT_LHR_F                     | TTCAAACCTTCATTGACTGTGCCGGCCGGCCCTTTTTTTTTCTTTTTTTTACTTTCCCAAG |
| CRT_LHR_R                     | TCTTGAAAACAAGAATCTTTTTATTGTCGAATGTATAATAAATAATATGACTGCGTGTAT  |
| CRT_sgRNA target site         | GGCTCACGTTTAGGTGG                                             |
| CRT_LHR integration primer_F  | TTCTTATACTTGAACCTTTTTTTTTTTTTT                                |
| CRT_RHR integration primer_R  | ATATGGTAAATGAACTAAAAAGGGAAAAAT                                |
| GSK3_RHR_F                    | CCAATTTTTTCGGGACAGTCAAGTGTGGATCAGCTAGTTA                      |
| GSK3_RHR_R                    | CTGATGAGTTTCTGTTGCGCCCGGGACAATGCATGGATCTCGTAGTTCATCAAAAAAGG   |
| GSK3_LHR_F                    | GTTTTCAAACCTTCATTGACTGTGCCGGCCGGCCAACCAATAGATATACATATAAATAA   |
| GSK3_LHR_R                    | CTTGAAAACAAGAATCTTTTTATTGTCGTATAATTACAAAATTGACAAAAGGTAATAATC  |
| GSK3_sgRNA target site        | GAGTGATCAGAAGGACGAAG                                          |
| GSK3_LHR integration primer_F | TATACCATCATATTTACAATATCGTGAGTAT                               |
| GSK3_RHR integration primer_R | CAAAAGTTGAACAGCTCTGGTAGC                                      |
| HT_RHR_F                      | GGCTTATGTTTTATTTCCTTCTGTCATATCATTAAATAGG                      |
| HT_RHR_R                      | GCTGATGAGTTTCTGTTGCGCCCGGGACAATAAATAAGCAACTAAAACCTCTACACATCC  |
| HT_LHR_F                      | AAACTTCATTGACTGTGCCGGCCGGCCATTCTATAGAACATTTTATATAACAAAAATG    |
| HT_LHR_R                      | TCTTGAAAACAAGAATCTTTTTATTGTCCCAAAAACAATATGAAACGTGAAAATTAATA   |
| HT_sgRNA target site          | GGCTCAGTCGAATCAGCCTT                                          |
| HT_LHR integration primer_F   | TTTTTTTTCATGTCACAAATATGGAATAA                                 |
| HT_RHR integration primer_R   | CTGAAAAAACTATGAAAAGAATCGAAG                                   |
| TrxR_RHR_F                    | AAGAAATTAGTTACAACCTGTACAATCTCACATACGTTTAT                     |
| TrxR_RHR_R                    | CTTCGCTGATGAGTTTCTGTTGCGCCCGGGACAATCAATGTCTCTTTTCTCCAATAGC    |
| TrxR_LHR_F                    | ATTGGTTTTCAAACCTTCATTGACTGTGCCGGCCGGCCGTGGGTGGACTTTAAGTTTAGTT |
| TrxR_LHR_R                    | GTTCTTGAAAACAAGAATCTTTTTATTGTGCCCAAATGTGTAAAAATAAAAAAGAGAGA   |
| TrxR_sgRNA target site        | AGGAGGAGGTCCAGGTGGAA                                          |
| TrxR_LHR integration primer_F | GTA AAAATGTGTTATTCTTAACCTTTGATATTGAG                          |
| TrxR_RHR integration primer_R | TATGCTTTTTCTTCTGAATATCCACAT                                   |
| pSN150_LHR integration_R      | TGAACATAAAGTACAACATTAATATATAGC                                |

pSN150\_RHR integration\_F                      TAAATACCTAATACAATCCAGGCAGA

---

---

Legend: LHR, left homology region; RHR, right homology region; F, forward; and R, Reverse.

**Supplementary Table 2B.** Recoded regions (*T. gondii* codon composition) used during to construct pSN150 knockdown donor vectors.

CK recoded region (bp 1-687)

ATGgagagtaaaatctgcgatccgatcggactcgacaaaaataattccgcaaagtggaggaagaaaacgaggaaaattcgaagatcgtggaaaat  
ggccaaatgacgtacaatgacgatctcgaatgttcacgaccattcaactgaaccaggagattgatatccgaaaaaacccgtttccactgcatatgattaac  
caaaagaacgacatccctctctgtgcgcaagagtctctaagcttaccgaccactctacatcaaaaagattgcttggagaagggtccacgactggctcgcg  
atgcaacgaggacgacgttgcgtcaaccagatcctctcgggctgactaaccagctgttcgaggtcagcatcaaggaggacactgctattgagtaccgt  
attacgcgccacgctcttttcgtatctacggcaaggatgtggacgctgtgtacaatccgcttagcgaattcagggtgtataaaactatgctgaagtacc  
gaatcgtccactgctcctaacagcttggatggaggcagaattgaagagtggctctacggggaccgcttctatcgacgatcctcaaaaacaatctatctt  
ggtgggcattgcaaatgtgcttggtaaattccacacttgcctgggaagcgacacttgcctggagcattgggacaagacccc

CRT (bp 1-456)

ATGaaatttgcgtgaagaagaataaccagaaaaacagctcgaaaaatgacgagaggtacagagagttggacaacctgtccaggaaaggtaaccgga  
tcgagacttggaggtggtcttgcctgggcaagtgtgcatatgtctcaagtgtattttaaagaaatcaagacaacattttattfacatcctgagatcattta  
ctgtctgtctgtgatgaataagattttgcaaagcgcactctcaacaagatcggaaactcttctgactccgaaacgcacaacttcattgtatgatt  
atgttttattgtactctctgttgcgtaataaaaaaggaaactcaaggaacgtcaccgatcttcaaccttcagttcttgcctatccatgcttgacgcgt  
gcagcgtgattctcgacttatcgggctcagaggacaact

GSK3 (bp 1-801)

ATGaagaattggccatcgacgaggatatcaatatctacgaagaaaagaaccacacaacaagaactacgtcaataactcgagatgctggacc  
aaaaagacgaggaggaatactcgcactcgagtaataggtccgaagacgaagacgaagagcgcacgattgacaacgaaattaaccgttctcctaataaa  
tcttacaagttgggaaacattatcgcaatgggtcttctggcgctctacgagccatctgcattgatactagcgaacaggttgcgtaagaaggtctc  
caggaccacaatacaagaacagagagctcatgatcatgaagaactgaatcatattaacatcatctatctgaaggactactactacaccgagctcttaag  
aaaacgaaaagaatatcttctcaatgtcgtcatggagctacccccagaccgttcacaagtacatgaaatactacagtcgcaataatcaggctctcct  
atgtcttggtaaacctctacagttaccaactttgctgagcactctcctacattcacttcaatttatttccaccgagacctaaacctcagaatctgctcattga  
tccgcaaccatacgttgaagcttgcgatttggctccgctaagaacctctcgcgggtcaacgatccgttcttcatctgctcgcctctatcgcgcc  
cagagctgatgcttggctctcgaactataccacacacatcgactgtggtctctggggtgcatattgccgagatgattctgggta

HT (bp 1-618)

ATGactaaaagctccaaggacatttgcagcgagaatgagggcaaaaaaacggtaaatctggcttttcttaccttctcaagtacgttcttccggcgtg  
cattgcttgcatttttgggtaccaggttagtgtgctcaactatcaagaattttatcgtcgtcaggtcgaatggtgtaaaggcgagaaggatagacttaa  
ttgttcaacaatacgaftcagagctcgttcttctgctcaccgttcttaccgggcccgtgctcggctcggattctctggatacctggttcagtttgcgtcgt  
cttctctgcttattatctacaactcttctctctggtgctcatcctacgtcgtacacacatcacttctactattctgttgcagattgctgagtgattggcat  
cggactggtgacgggtgctccgtccaatgtatattctgagatgaccacaaggacaagaaagggcgtacgggggtgatgcaccaactctcatcagttc  
ggcatcttctgctgagtgctgggtctcgcctgggagaggggtccaaaggcggacagcacagaaccgcttaccagcttctgtaagctctggtgg

TrxR (bp 1-609)

ATGaataatgttatcagctttatcgtaactctagcaacaagtacttccagatcaatcagctccatttcatccggatcatcaataaaaacatccactcgaag  
aataaccttatcaacttaacagctcgtataacgtgttctacaataatatttcatcaagaacttccagaataagaataagctgtccagcatctacttaag  
tcaacttctatcaagaatgtgtaaggataaaaacgagaaaaagaattacgagcacgtcaacccaacgagaaaaacggctacttggccagcgaga  
aaaatgagctcacgaagaacaaggttggaggacacacttacgactacgactacgtcttattggggggggacctgggggaaatggccagtcgaagga  
ggccgcccccacggcgcgagagtgctccttctgactacgtgaagcccagttcgaaggaaccaagtggggacattgggggacatgcgtgaacgtg  
ggatgctcccgaagaactcatgactacgtggacacatggggagcatttcaagctggactcgaagcttacggatggaagttcgacaatctcaag  
cacgactgg



**Supplementary Table 3.** List of oligonucleotides used to construct pSN150-based knockout donor vectors and validate locus-specific integration in edited *P. falciparum* lines.

| Description                   | Nucleotide sequence                                                                          |
|-------------------------------|----------------------------------------------------------------------------------------------|
| CK_RHR_F                      | CTAAATATATATCCAATGGCCCCTTCCGGGCGCGCCGATCATTTATGTGTTTTCTGGTAGCAC                              |
| CK_RHR_R                      | CTTCTTCGCTGATGAGTTTCTGTTGCGCCCGGTAACATATTGCATAATTTTTAATTTATTTCAAATTATGGGG                    |
| CK_LHR_F                      | TTCAAACCTTCATTGACTGTGCCGGCCGGCCGATGTATCACATAAGTTTTGATTTTATC                                  |
| CK_LHR_R                      | TCTTGAAAACAAGAATCTTTTTATTGTCCTGTTCTATTAGGTGCTAGATACTAATTTTAC                                 |
| CK_sgRNA target site          | ATGGTGGGCGTATCGAGGAA                                                                         |
| CK_LHR integration primer_F   | CACATTATTGTAAACCTGTATACGCAC                                                                  |
| CK_RHR integration primer_R   | AGAGGTATATAATTTATATATTATTATTTACATATTATTGATGACAC                                              |
| GSK3_RHR_F1                   | ACTAAATATATATCCAATGGCCCCTTCCGGGCGCGCCGATATATATATATATATATATATATATCAGGAAATAATTAACACTGTAAACATGG |
| GSK3_RHR_R1                   | AGATCTTCTTCGCTGATGAGTTTCTGTTGCGCCCGGATAATGATATAAAGAATCATATGATTAAATTTTAAATACAGC               |
| GSK3_LHR_F2                   | TTCAAACCTTCATTGACTGTGCCGGCCGGCCAACCCAAATAGATATACATATAAATAAATAAATAAATATATAAATATATATTATTTCC    |
| GSK3_LHR_R2                   | GTTCTTGAAAACAAGAATCTTTTTATTGTCGTATAATTACAAAATTGACAAAAGGTAATAATCAAAAATATTAATTG                |
| GSK3_sgRNA target site        | GAGTGATCAGAAGGACGAAG                                                                         |
| GSK3_LHR integration primer_F | TATACCATCATTTTACAATATCGTGAGTAT                                                               |
| GSK3_RHR integration primer_R | GTATAAAATTTATAAGCGTTTCTACTGATCCAC                                                            |
| TrxR_RHR_F                    | TATATATCCAATGGCCCCTTCCGGGCGCGCCATGCATTTATAGTTCACTGCATTTCTCC                                  |
| TrxR_RHR_R                    | TCACAGATCTTCTCGCTGATGAGTTTCTGTTGCGCCCGGGATGTTTAGCCAATTCTATTGAAGCATCAC                        |
| TrxR_LHR_F                    | ATTGGTTTTCAAACCTTCATTGACTGTGCCGGCCGGCCGTGGGTGGACTTTAAGTTTAGTT                                |
| TrxR_LHR_R                    | GTTCTTGAAAACAAGAATCTTTTTATTGTCGCCAAATGTGTAAAAATAAAAAAGAGAGA                                  |
| TrxR_sgRNA target site        | AGGAGGAGGTCCAGGTGGAA                                                                         |
| TrxR_LHR integration primer_F | CCGTTTTATTAGTGTCTATATGG                                                                      |
| TrxR_RHR integration primer_R | CACGAATAAAATGATGAAATATGTGGATATGC                                                             |
| pSN150_LHR integration_R      | CTTCGCATCTGGGCAGATGATGTC                                                                     |
| pSN150_RHR integration_L      | AGCTACCCATACGATGTTCCAG                                                                       |

Legend: LHR, left homology region; RHR, right homology region; F, forward; and R, Reverse.

**Supplementary Table 4A.** List of oligonucleotides used to construct pSN054-based knockdown donor vectors and validate locus-specific integration in edited *P. falciparum* lines.

| Description                  | Nucleotide sequence                                                                               |
|------------------------------|---------------------------------------------------------------------------------------------------|
| AAT_RHR_F                    | AGTGGTGTACGGTACAAACCCGGAATTCGAGCTCGGTAATTAATTAATATGTTTTAATTAATAAAAAAAAAAAAAAAAAAATAAATAAATATAAATA |
| AAT_RHR_R                    | GATAAGACGAGAGATTGGGTATTAGACCTAGGGATAACAGGGTAATCATATCTTAGATCCGCTTGAC                               |
| AAT_LHR_F                    | TTATTGGTTTTCAAACCTCATTGACTGTGCCGGCCGGTGGGTATTAACATAATGGTCAG                                       |
| AAT_LHR_R                    | GCTATAAAAAATACCATCCGCAAA                                                                          |
| AAT_sgRNA target site        | GTCCACGAAATGGTCATCAT                                                                              |
| AAT_LHR integration primer_F | TATCAAATTCGGATTCTAAGCATATTAT                                                                      |
| AAT_RHR integration primer_R | ACAAGTGTGTATATCGTGTGGTATAA                                                                        |
| FC_RHR_F                     | CGGTCTCAGTGGTGTACGGTACAAACCCGGAATTCGAGCTCGGATCCATAAGCGAAAAAATGATTA                                |
| FC_RHR_R                     | GGATAAGACGAGAGATTGGGTATTAGACCTAGGGATAACAGGGTAATAAATAAATAAATAAAGGAAGGAAGGC                         |
| FC_sgRNA target site         | ATAATAAGGCTAGCTAAACA                                                                              |
| FC_LHR integration primer_F  | GTACACATTTGTATTACCTTTCAG                                                                          |
| FC_RHR integration primer_R  | GCTTTATGTTTTCTTTTTTGTGTAT                                                                         |
| HT_RHR_F                     | TCTCAGTGGTGTACGGTACAAACCCGGAATTCGAGCTCGGGACCAAGTCGGTTGTATGAT                                      |
| HT_RHR_R                     | TGGATAAGACGAGAGATTGGGTATTAGACCTAGGGATAACAGGGTAATGTGGAGGTAGTAGCATAATAAA                            |
| HT_LHR_F                     | ATTGGTTTTCAAACCTCATTGACTGTGCCGGCCGGCTCTGGTTTACAACAATTTACAGG                                       |
| HT_LHR_R                     | GTCTGATGGGAAGACAAC                                                                                |
| HT_sgRNA target site         | AAGCCATACATAACTATGG                                                                               |
| HT_LHR integration primer_F  | TTAGTTACCGTAAGTGTTCCATGTATA                                                                       |
| HT_RHR integration primer_R  | ACCTACTTTTGACCATATCATAATTTCTAC                                                                    |
| pSN054_LHR integration_R     | GCCCTTATCATCATCTTT                                                                                |
| pSN054_RHR integration_F     | TCTTGAGGGGTTTTTTGCG                                                                               |

Legend: AAT, putative amino acid transporter (PF3D7\_0209600); FC, ferrochelatase (PF3D7\_1364900); HT, hexose transporter (PF3D7\_0204700); LHR, left homology region; RHR, right homology region; F, forward; and R, Reverse. The FC LHR and recodonized regions were synthesized as a single fragment on the BioXp™ 3200 System (SGI-DNA).

**Supplementary Table 4B.** Recoded regions (*T. gondii* codon composition) used to construct pSN054-based knockdown donor vectors.

AAT recoded region (bp 4076-4506) intron 7 removed, stop codon removed

AACGAGATCAAGGAGAAGGTCAAGATCATACCCAAAGGCTGGGTCTTTTTTCAGCATCTTCTTCTGGGTCTTCATCATGTTGTTGCTCTTCTTGTTCCCTTCTTCACC  
CAAACGTTTCGAGAAATACTGCGCGTACGACGATCACTTTGTGCGATTTTCAGCATCTTGCCGAGTAAACCGCTCAAGGAGGTCCAGAACTTCAACATATTGAGCTACT  
TCTACGAGTTCAAGAACATACGCAAACGCCGCAAGAAAAAACGAAGAAGATACGCGTGGAC

FC (bp 1341-1512) stop codon removed

CTCAACTTGAACAAGGACGACTACATCCTCGTGTTCAGAGCAAGATAAAGGGCCAGCAGTGGGTCAAGCCCTGCATAGAGGACACGATCATCCGCTTGCGGAA  
GCAGGGCTACAAGCAGATCGACATAGTGTGCGCCAGCTTTAGCAGCGACTGCCTCGAGACCCTCGAGGAGATCAAGATCCACTACCAGCAGCTCTTCAGGAAGT  
ACAGCAACGGCAACCTCCGCTACATCAACTGCCTCAACGACACCACCATAGGGATAAAGTTGATCATGAACTTGATCGAGCAGAACATCATCGGCTGGGT

HT (bp 1342-1651) stop codon removed

ATAATAATAAAAAAGAGTCCAAGCATATTGTTTATCGTGTTCAGCGTGATGAGCATACTTACGTTTTTTTTTCATATTCTTTTTTCATAAAGGAGACGAAGGGTGGGG  
AGATCGGTACCTCACCTTATATCACGATGGAAGAAAGGCAGAAACACATGACGAAAAGCGTGGTT

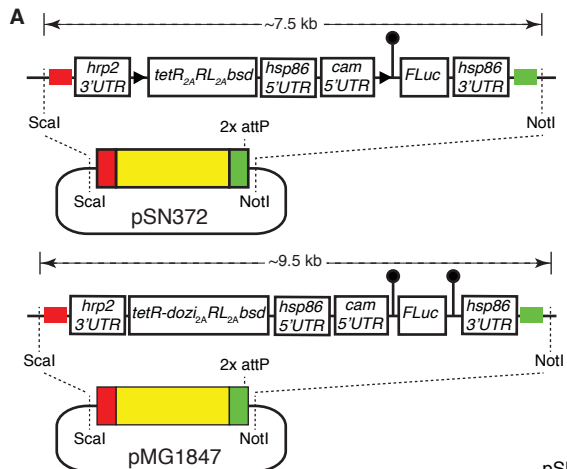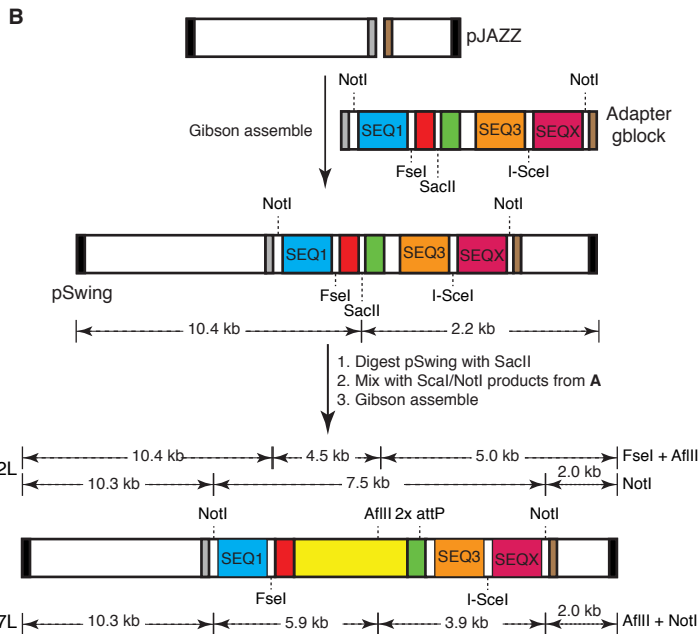

**C** pSwing restriction digest analysis

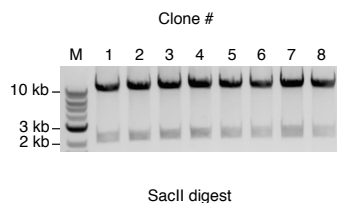

pSN372L restriction digest analysis

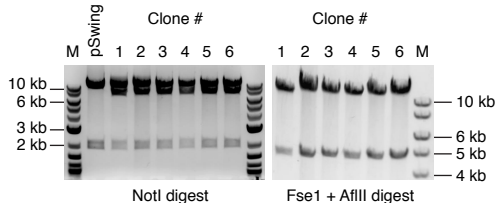

pSN1847L restriction digest analysis

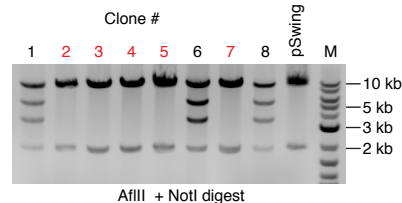

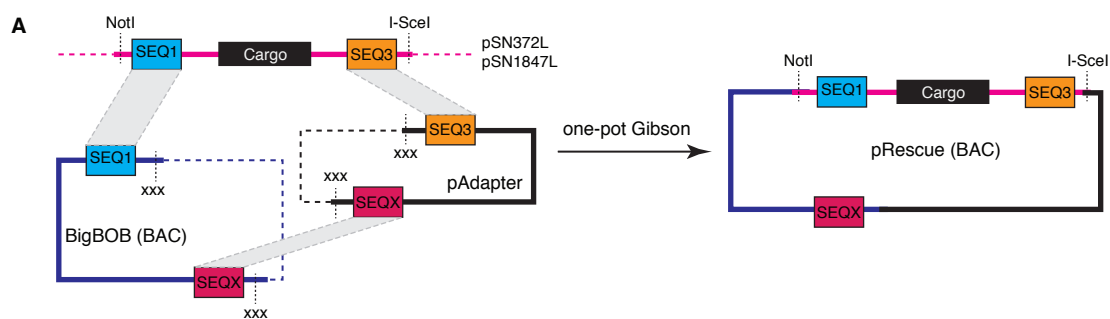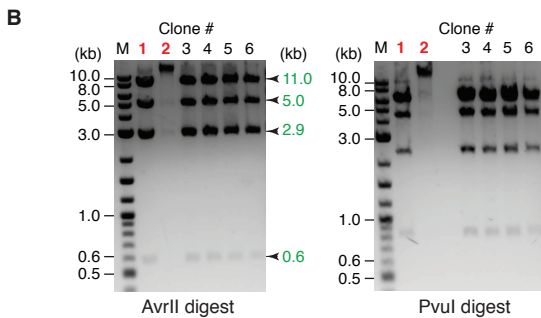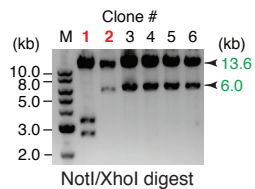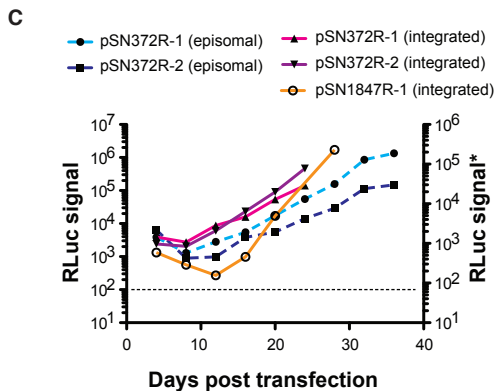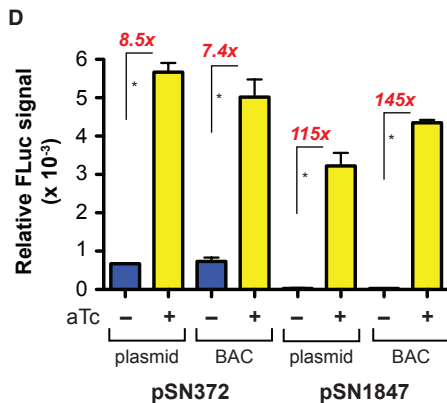

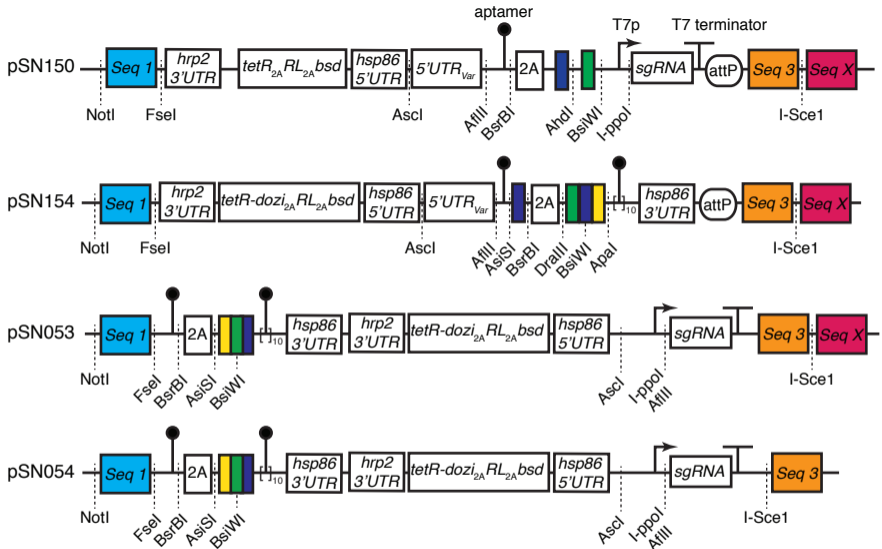

Epitope tags

= HA
  = cMyc
  = FLAG

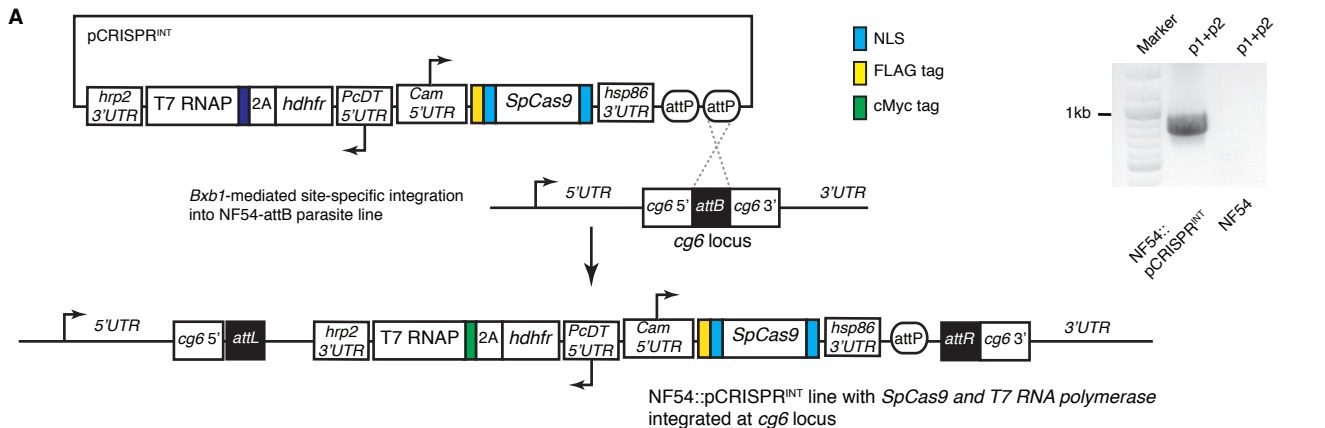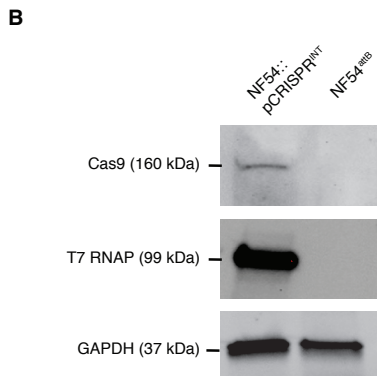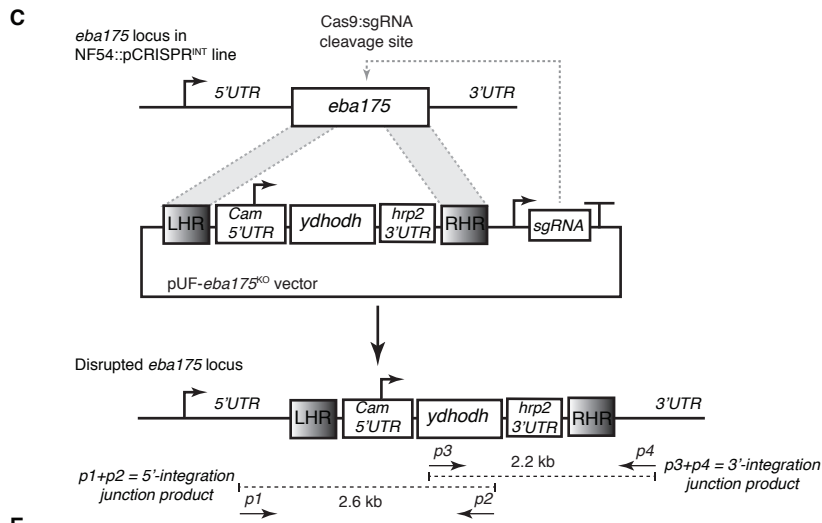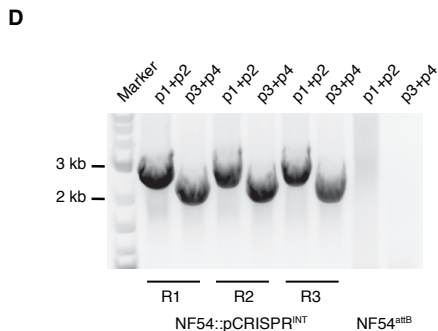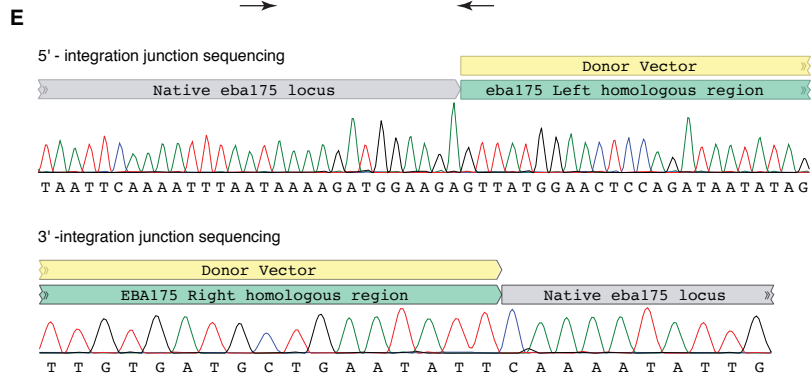

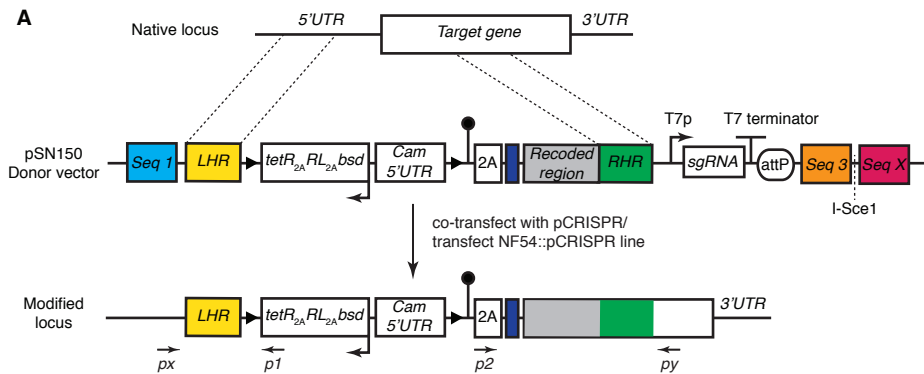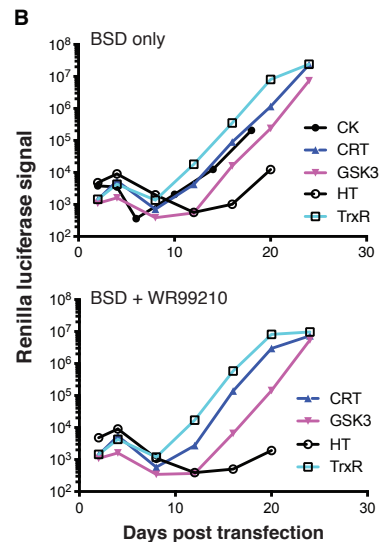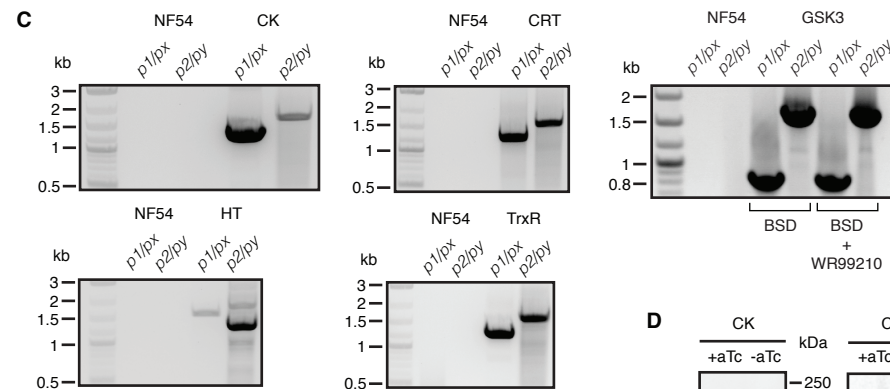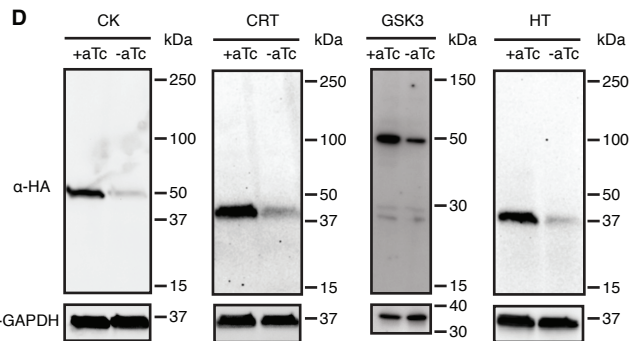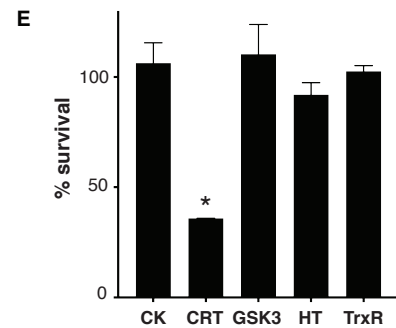



**A**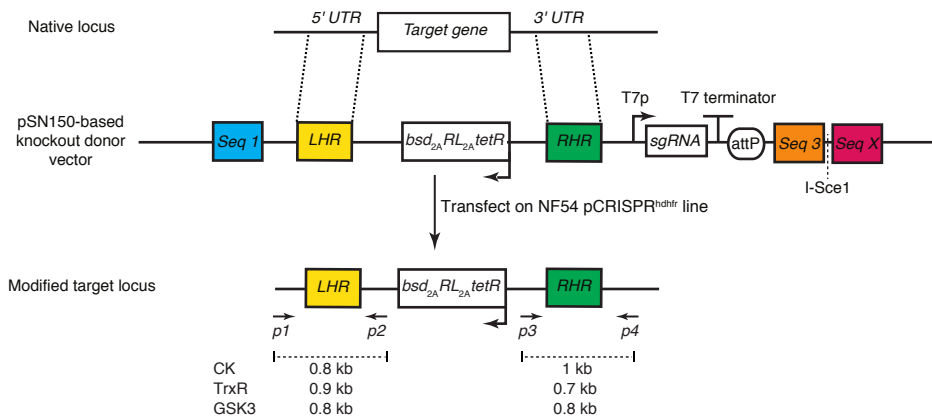**B**

CK-KO

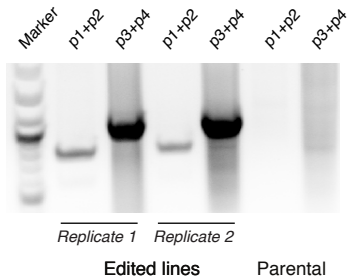**C**

TrxR-KO

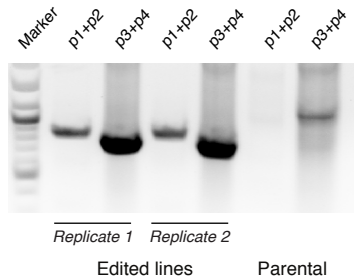**D**

GSK3-KO

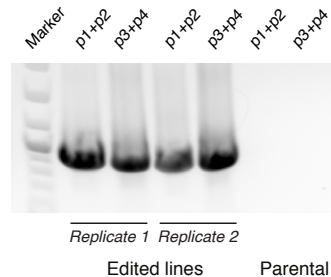

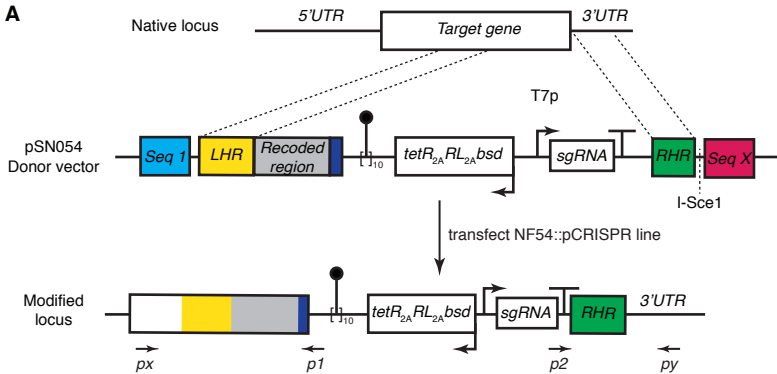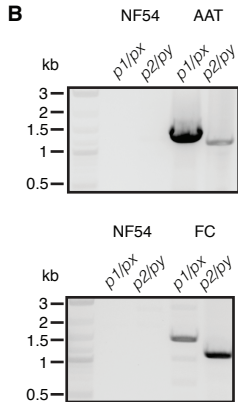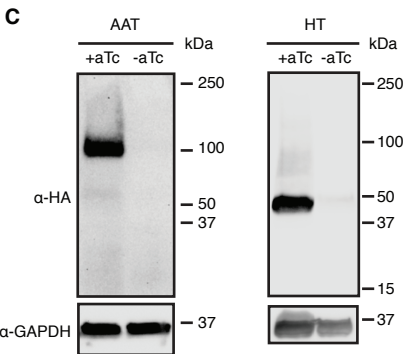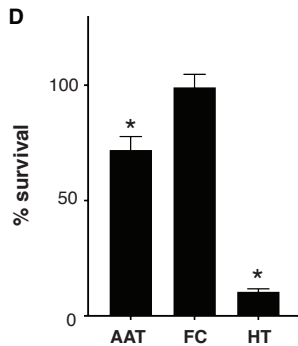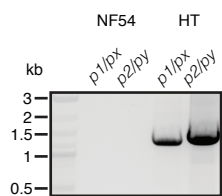

**A pSN154 vector**  
 – Configured for enabling over-expression of target CDS

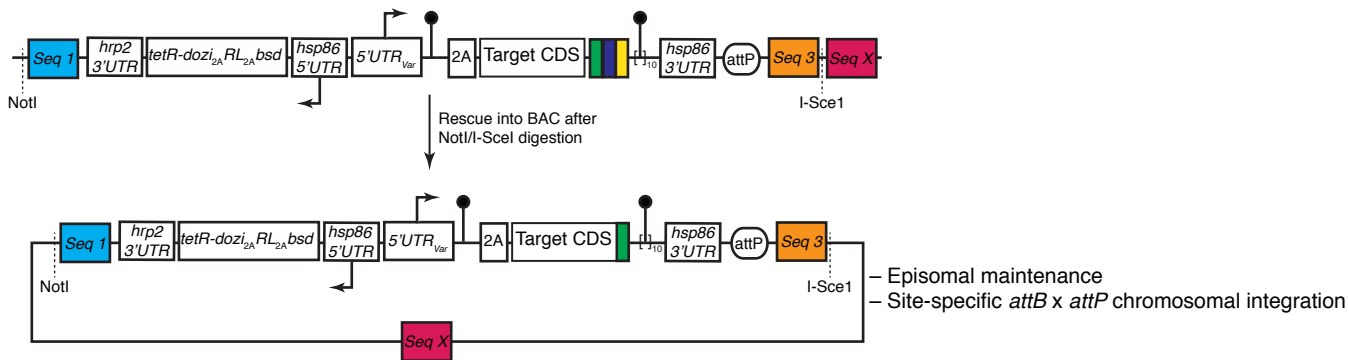

**B pSN150 configured for replacing a native 5' UTR with an aptamer-regulated synthetic 5' UTR using CRISPR/Cas9 engineering**

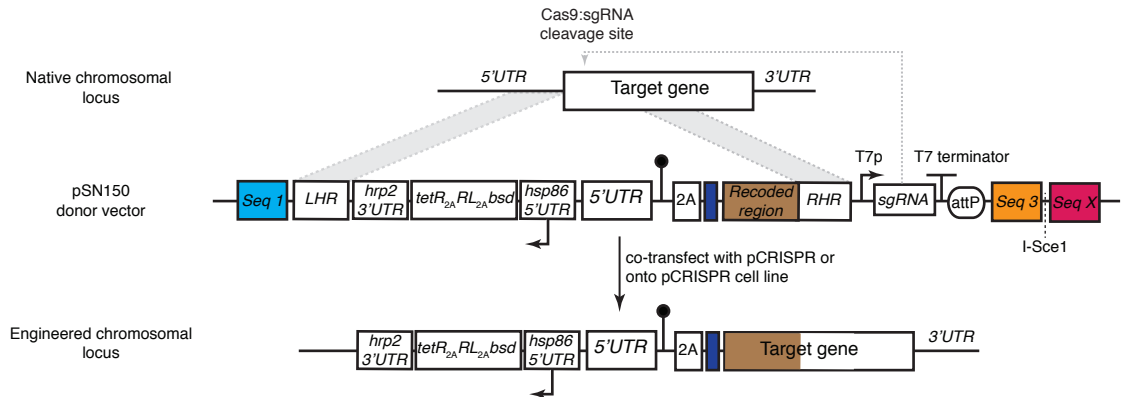

**C pSN053 configured for engineering a locus using CRISPR/Cas9 editing to achieve dual aptamer regulation**

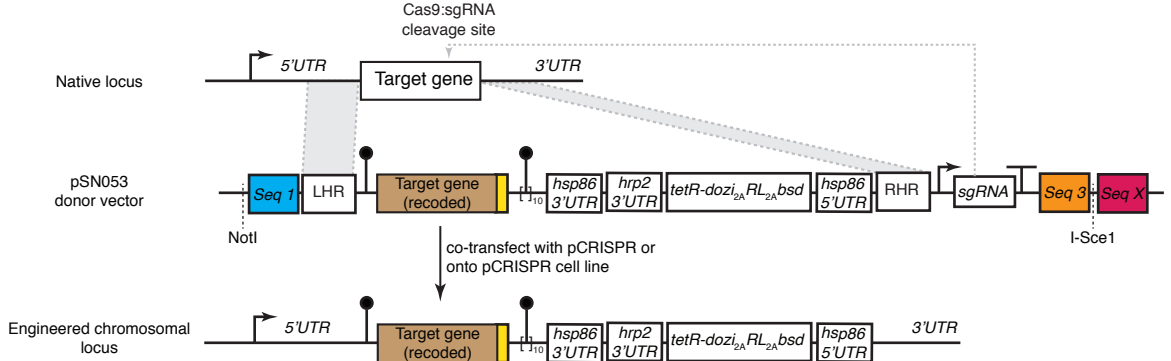

**D pSN053 configured for engineering a locus using CRISPR/Cas9 editing to achieve regulation via aptamers installed in 3' UTR**

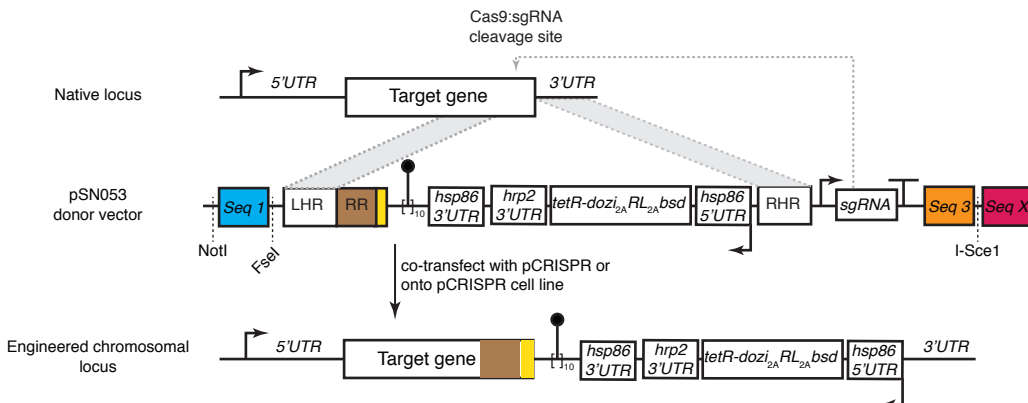

# Supplementary Figure 2A

ATGAAATGTAATATTAGTATATATTTTTTGGCTTCCTTCTTTGTGTTATATTTTGCAAAAGCTAGGAATGAATATGATATAAAAGAGAATGAAAAATTTTTAGACGTGTATAAAGAAAAATTTAA  
Native EBA175

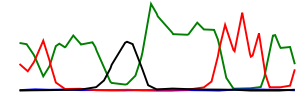

-----NNNANNGNAAAAATTTAA

TGAATTAGATAAAAAGAAATATGGAAATGTTCAAAAACTGATAAGAAAATATTTACTTTTATAGAAAATAAATTAGATATTTTAAATAATTCAAATTTAATAAAAGATGGAAGAGTTATGGAA  
Native EBA175

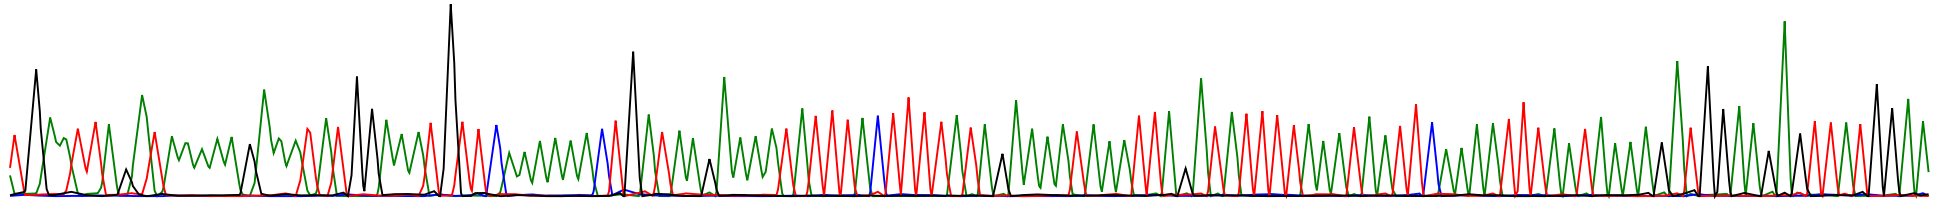

NGAATTAGATAAAAAGAAATATGGAAATGTTCAAAAACTGATAAGAAAATATTTACTTTTATAGAAAATAAATTAGATATTTTAAATAATTCAAATTTAATAAAAGATGGAAGAGTTATGGAA

CTCCAGATAATATAGATAAAAATATGTCTTTAATAAAATAAACATAATAATGAAGAAATGTTTAAACAACAATTATCAATCATTTTTATCGACAAGTTCATTAATAAAGCAAAAATAAATATGTTTCCT  
EBA175 Left Homologous Region  
Homologous template (Donor Vector)

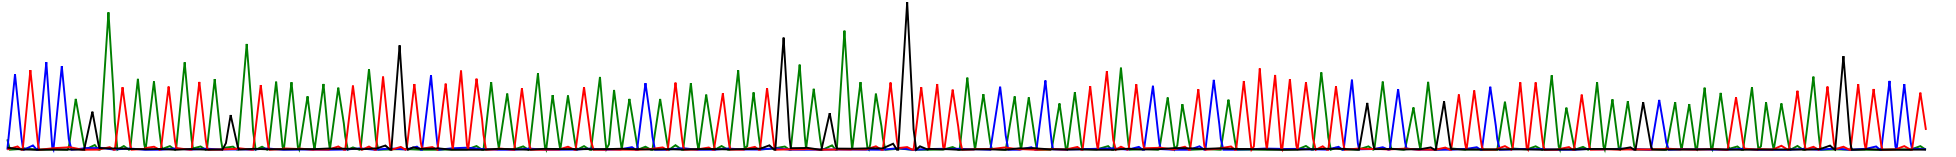

CTCCAGATAATATAGATAAAAATATGTCTTTAATAAAATAAACATAATAATGAAGAAATGTTTAAACAACAATTATCAATCATTTTTATCGACAAGTTCATTAATAAAGCAAAAATAAATATGTTTCCT

ATTAACGCTGTACGTGTGTCTAGGATATTAAGTTTCTGGATTCTAGAATTAATAATGGAAGAAATACTTCATCTAATAACGAAGTTTTAAGTAATTGTAGGGAAAAAAGGAAAGGAATGAAATG  
EBA175 Left Homologous Region  
Homologous template (Donor Vector)

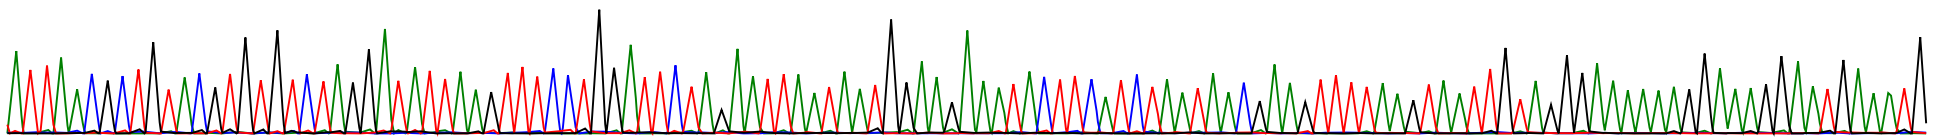

ATTAACGCTGTACGTGTGTCTAGGATATTAAGTTTCTGGATTCTAGAATTAATAATGGAAGAAATACTTCATCTAATAACGAAGTTTTAAGTAATTGTAGGGAAAAAAGGAAAGGAATGAAATG

## Supplementary Figure 2B

TAATAGATCAAATTGCCAAAAGTAAATGTAAAATAATACATTATATGAAGCATGTGAGAAGGAATGTATTGATCCATGTA

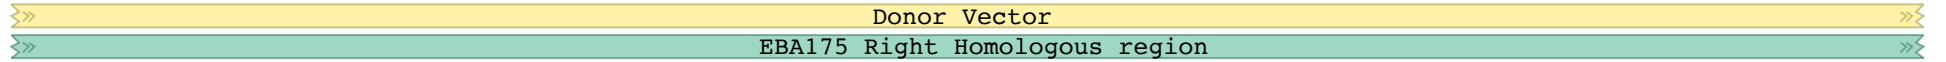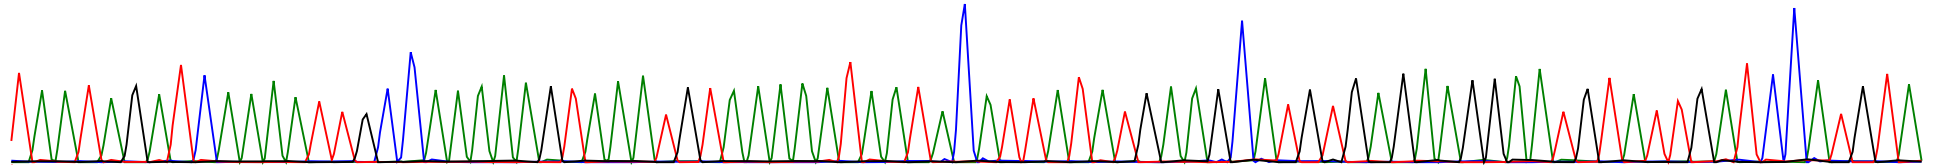

TAATAGATCAAATTGCCAAAAGTAAATGTAAAATAATACATTATATGAAGCATGTGAGAAGGAATGTATTGATCCATGTA

TGAAATATAGAGATTGGATTATTAGAAGTAAATTTGAATGGCATAACGTTATCGAAAGAATATGAAACTCAAAAAGTTCCAAAG

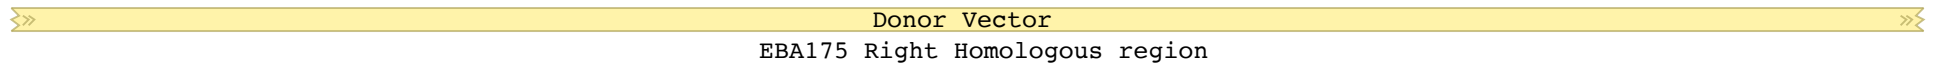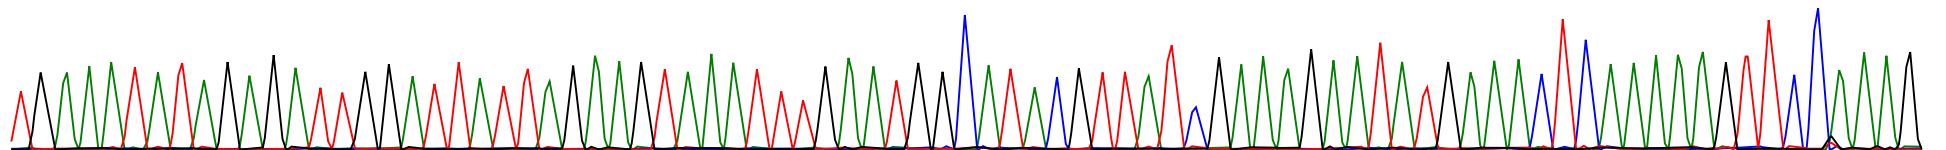

TGAAATATAGAGATTGGATTATTAGAAGTAAATTTGAATGGCATAACGTTATCGAAAGAATATGAAACTCAAAAAGTTCCAAAG

GAAAATGCGGAAAATTATTTAATCAAATTTTCAGAAAACAAGAATGATGCTAAAGTAAGTTTATTATTGAATAATTGTGATGC

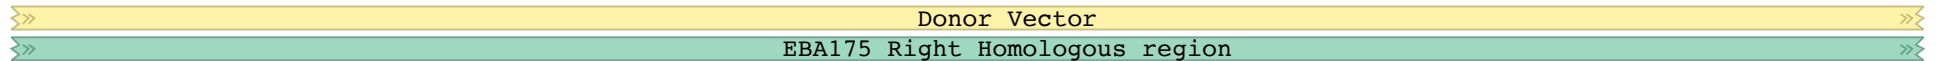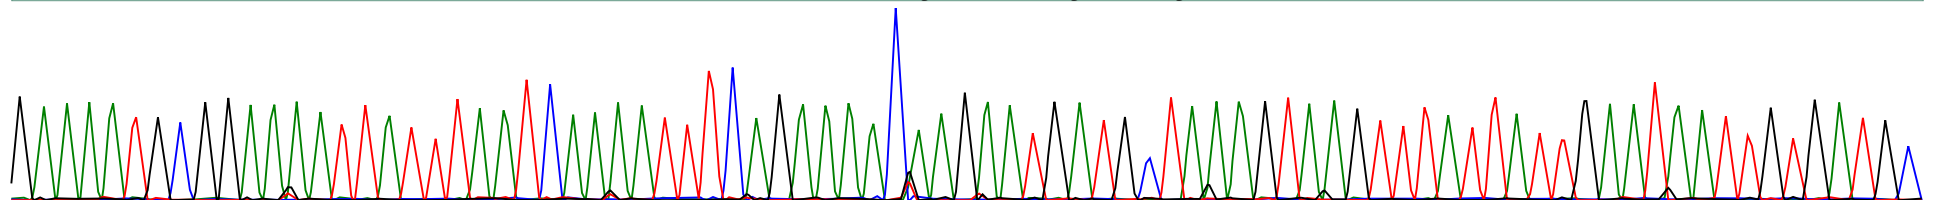

GAAAATGCGGAAAATTATTTAATCAAATTTTCAGAAAACAAGAATGATGCTAAAGTAAGTTTATTATTGAATAATTGTGATGC

TGAATATTCAAATATTGTGATTGTAAACATACTACTACTCTCGTTAAAAGCGTTTTTAAATGGTAACGAC-AATAC-AATTAA

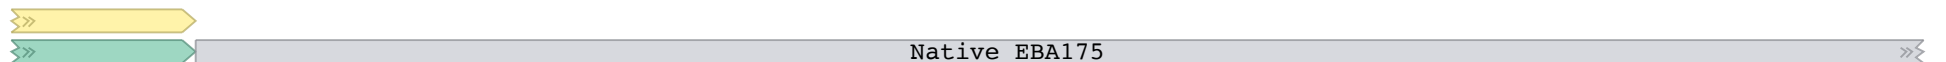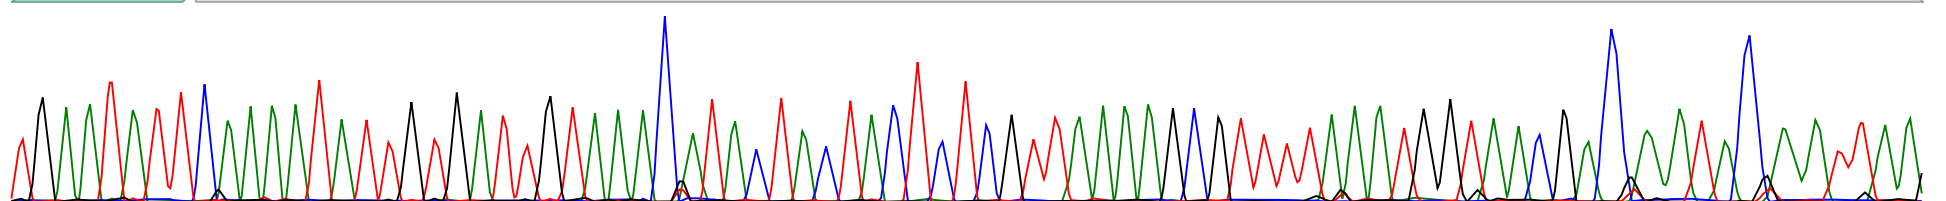

TGAATATTCAAATATTGTGATTGTAAACATACTACTACTCTCGTTAAAAGCGTTTTTAAATGGTAACGACNAATACNNATTAA

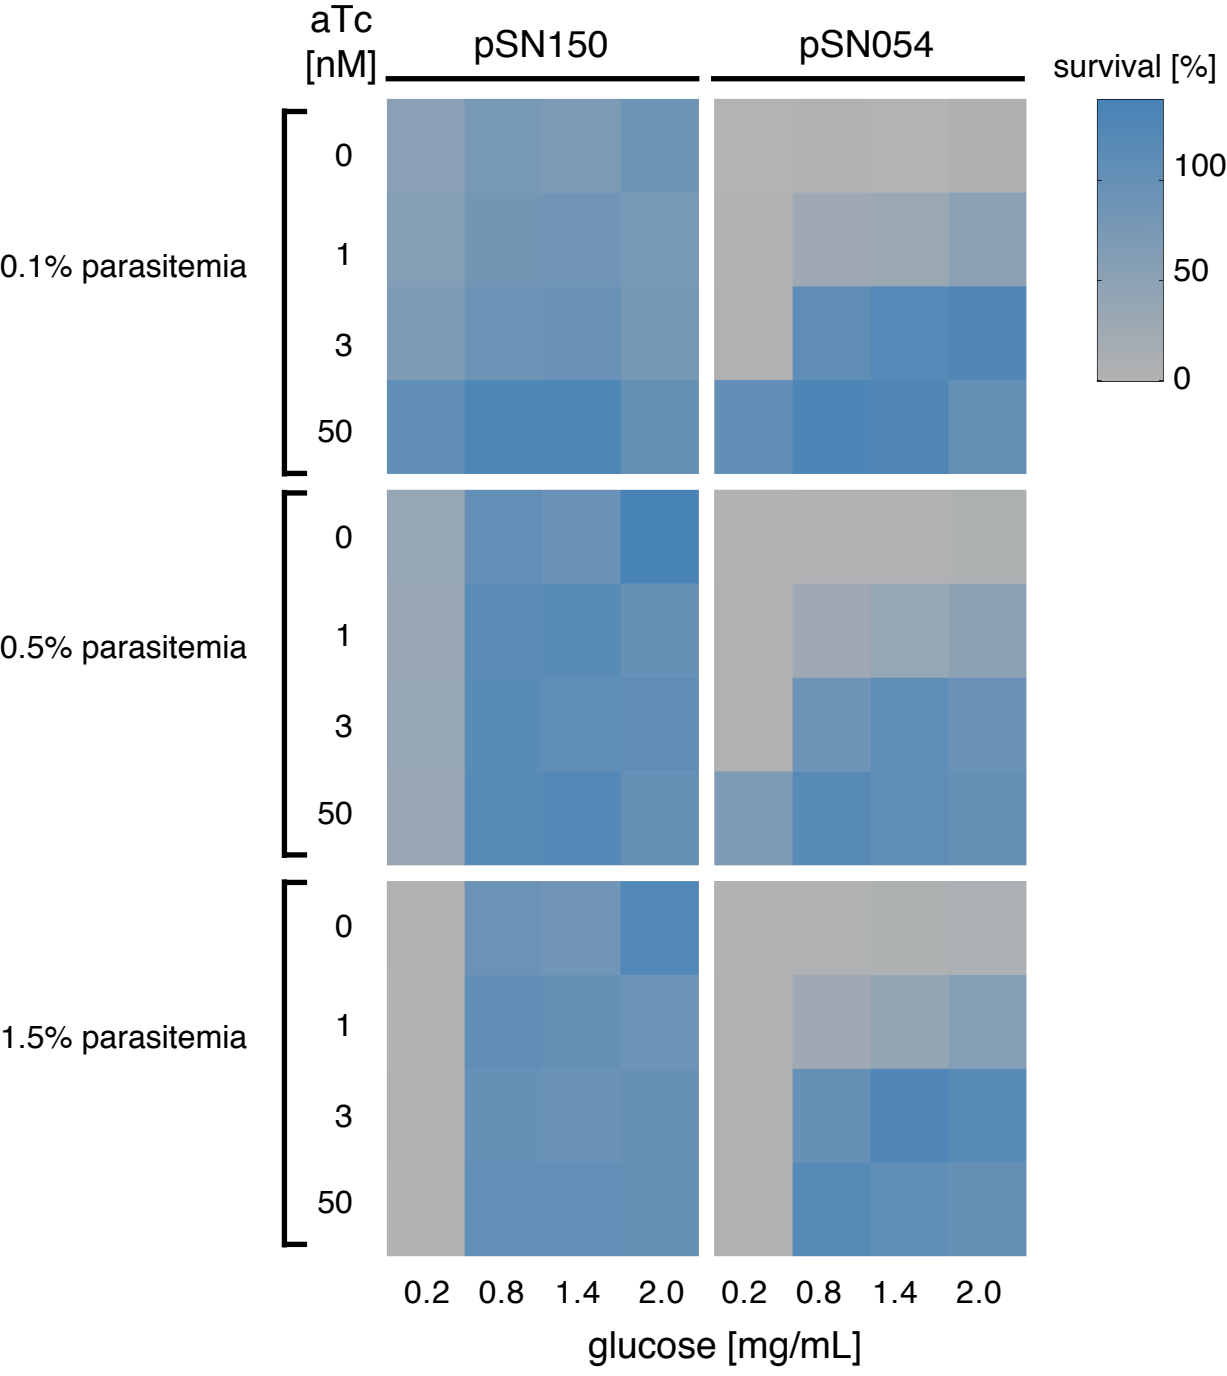

Source: http://biorxiv.org/content/10.1101/816504v1.full.pdf
